# Supplementary material
Source: PubMed Central journal article supplement (PMC5272179)
Supplement: jci-127-85145-s001.pdf [file jci-127-85145-s001.pdf]

# Supplemental Figure 1

A

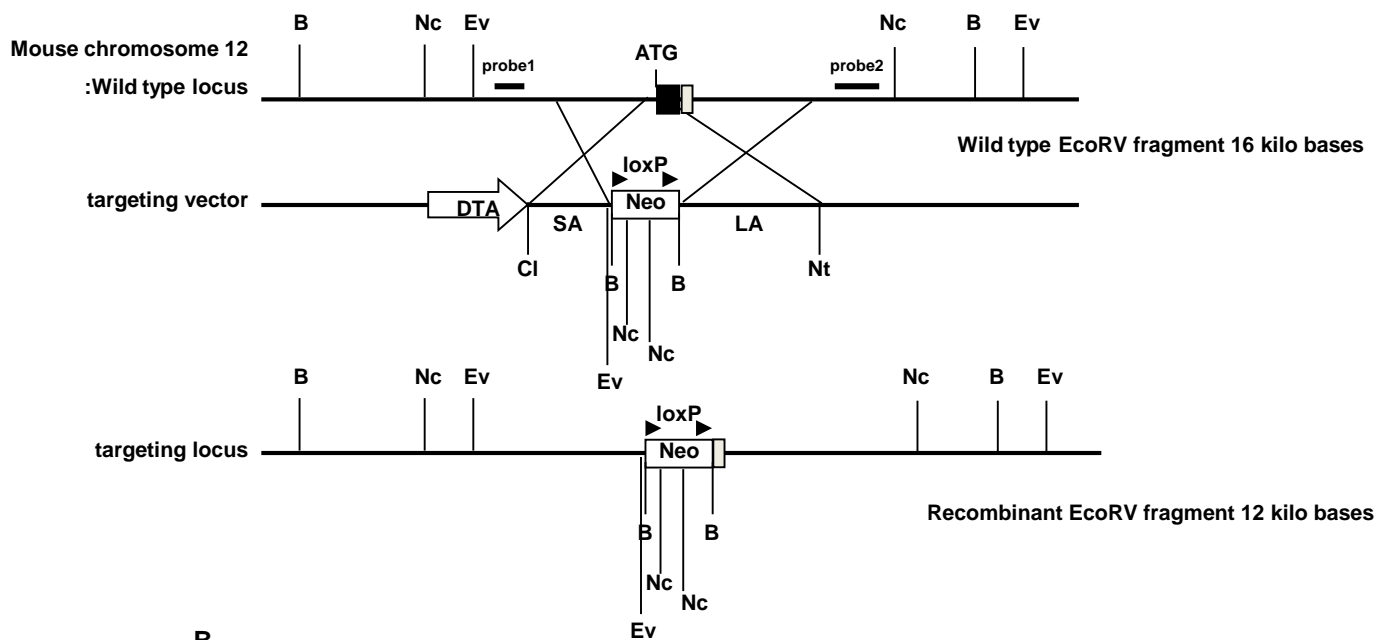

B

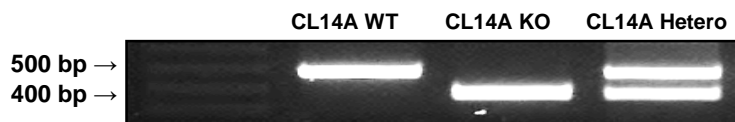

C

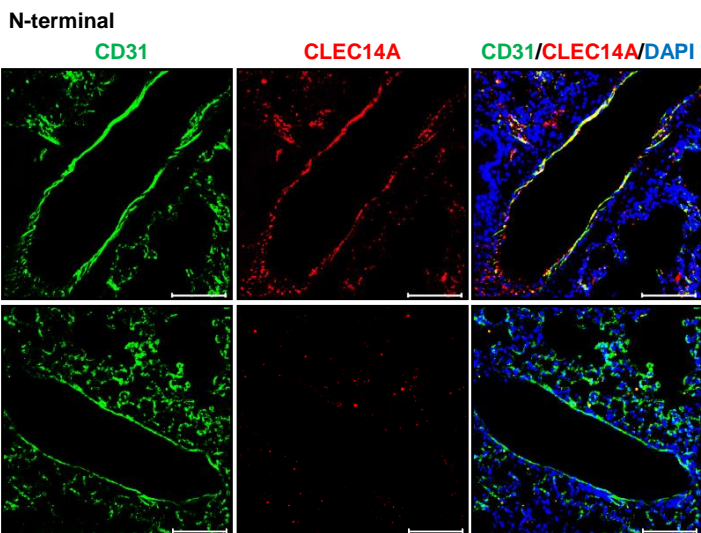

D

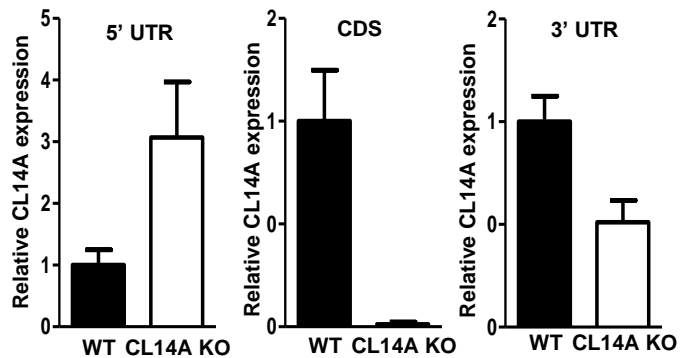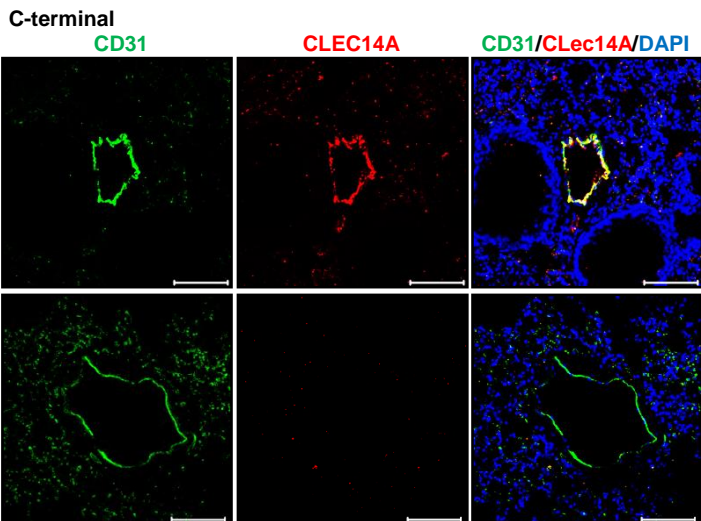

E

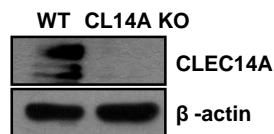

## Supplemental Figure 1

### Generation of CLEC14A KO mice

(A) Schematic diagram of the targeting strategy used to generate the CLEC14A KO mouse. (B) Genotyping PCR to confirm CLEC14A KO. A band near 500 bp represents the WT CLEC14A allele, a band near 400 bp represents the CLEC14A KO allele and 2 bands at 500 bp and 400 bp represent heterozygous mice. (C) Flat-mount staining of WT and CLEC14A mouse lung sections for CD31 and CLEC14A with two different antibodies, (CLEC14A with N-terminal and C-terminal antibodies). n = 3 per group. Scale bar: 100  $\mu$ m. (D) Relative mGAPDH-normalised real time-PCR analysis of cDNA generated from WT and CLEC14A mice lung lysates for the 5'-UTR, CDS and 3'-UTR of *clec14a*. (E) Western blot analysis of CLEC14A protein expression from WT and CLEC14A KO mice lung lysates. n = 6 per group. \*, P < 0.05; \*\*, P < 0.005; \*\*\*, P < 0.0001 by paired, 2-tailed Student's *t* test. Error bars represent the mean  $\pm$  SD.

**Supplemental Figure 2**

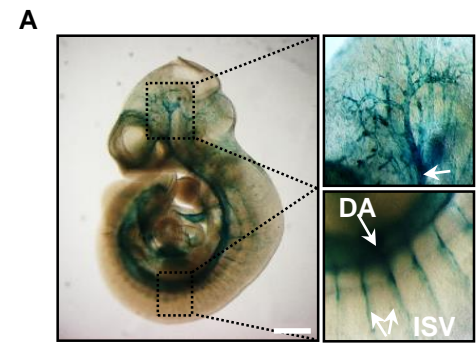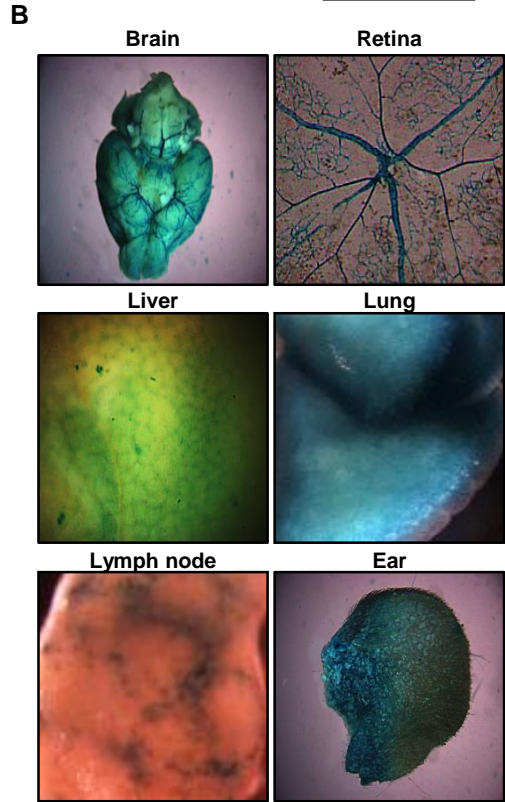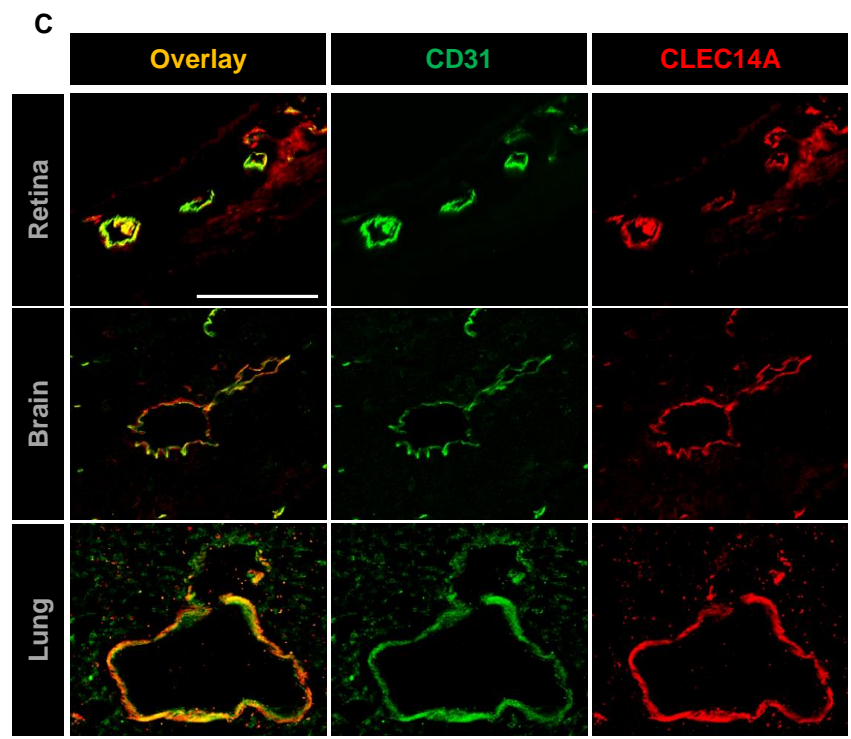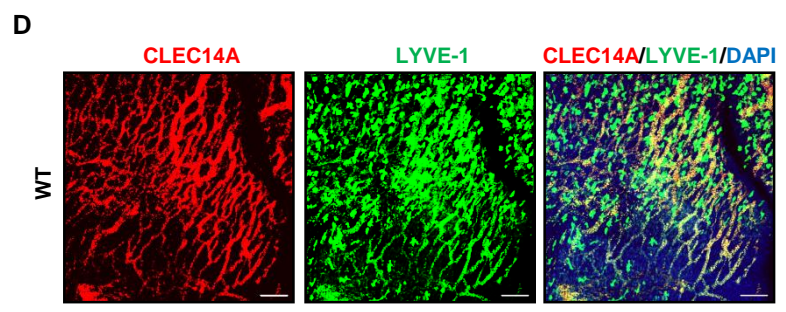

## Supplemental Figure 2

### Blood and lymphatic EC specific expression of CLEC14A

(A) LacZ staining of CLEC14A KO mice at E10.5. ICA, internal carotid artery; DA, dorsal aorta; ISV, intersomitic vessels. n = 3 per group. Scale bar: 50  $\mu$ m. (B) LacZ staining of adult CLEC14A KO mouse brain, retina, liver, lymph nodes, lungs and ears. (C) Immunostaining of 5-week-old WT mouse retina, brain and lungs. Scale bar: 100  $\mu$ m (D) Immunostaining of E15.5 WT forelimb for CLEC14A and LYVE-1. Scale bar: 100  $\mu$ m. All experiments were repeated on at least 3 different sets of WT and KO littermates.

# Supplemental Figure 3

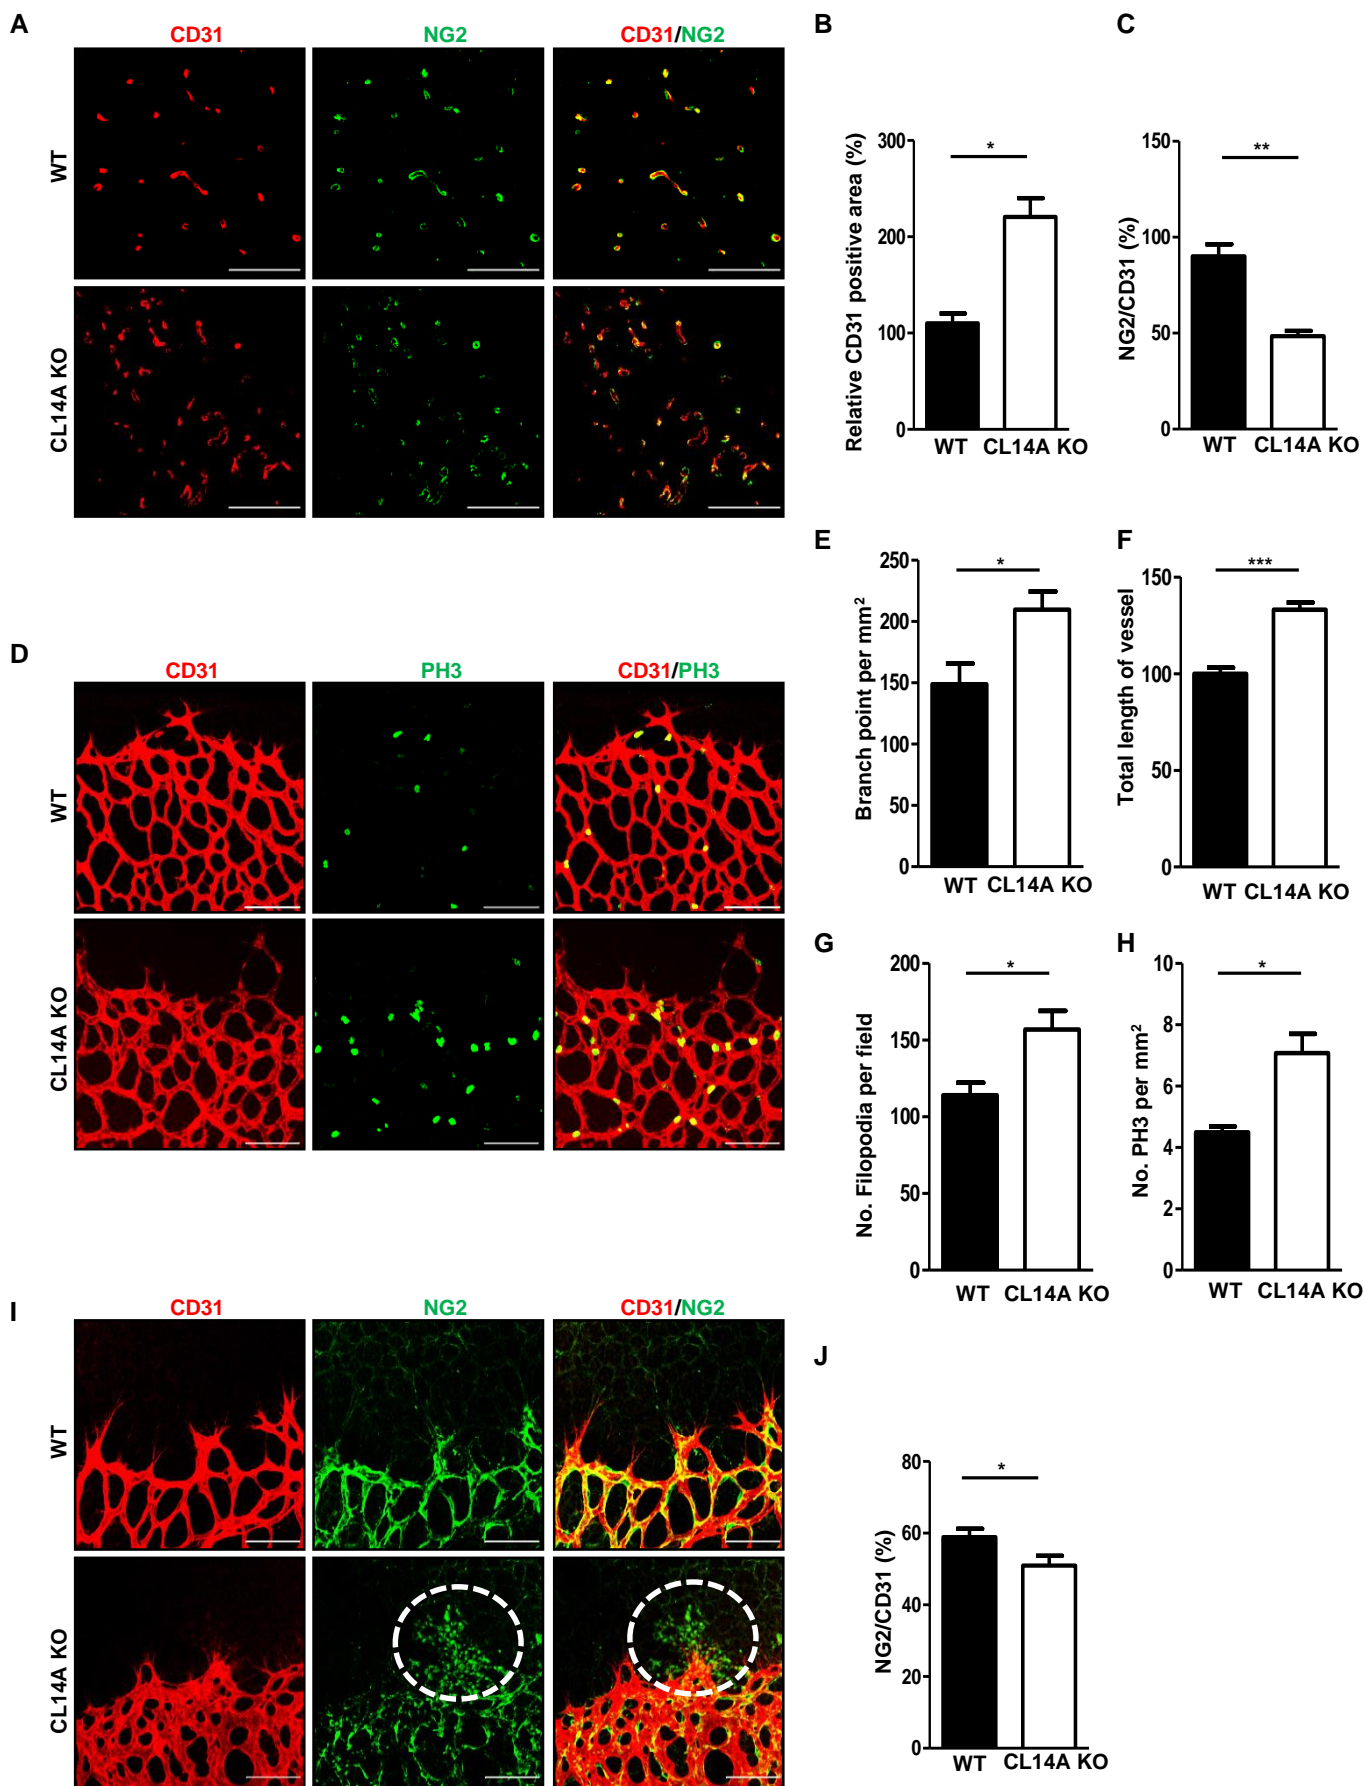

### Supplemental Figure 3

#### **CLEC14A deletion increases blood vessel density and reduces pericyte coverage**

(**A-C**) Immunostaining and quantification of blood vessels and pericytes (blood vessels, CD31-positive in red; pericytes, NG2-positive in green) in sagittal sections of E13.5 brain from WT and CLEC14A KO mice. n = 6 per group. (**D**) Whole-mount preparations of P5 retinas from WT and CLEC14A KO pups immunostained for CD31 and the proliferation marker PH3. n = 6 per group. (**E-H**) Quantification of the number of branch points, total length of vessels, number of filopodia and number of PH3 puncta. n = 6 per group. (**I and J**) Whole-mount preparations of P5 retinas from WT and CLEC14A KO pups immunostained with CD31 and NG2 antibodies. Quantification of pericyte coverage per blood vessel (blood vessels, red; pericytes, green). n = 6 per group. Scale bar: 100  $\mu$ m. All experiments were repeated on at least 6 different sets of WT and KO littermates. \*, P < 0.05; \*\*, P < 0.005; \*\*\*, P < 0.0001 by paired, 2-tailed Student's *t* test. Error bars represent the mean  $\pm$  SD.

Supplemental Figure 4

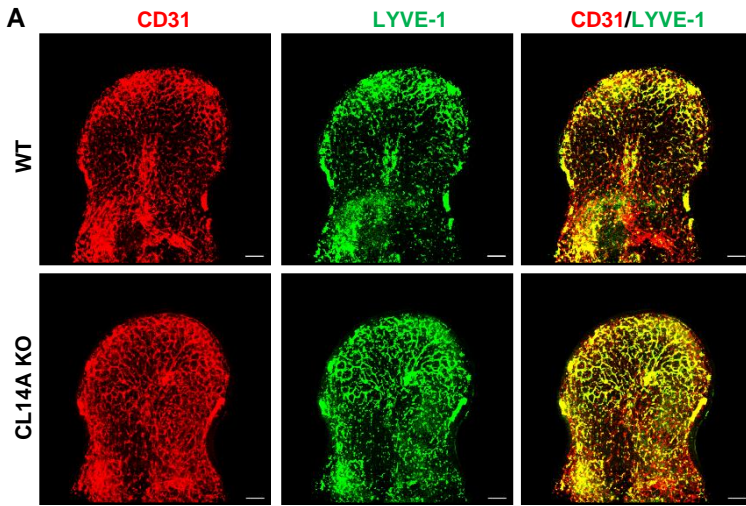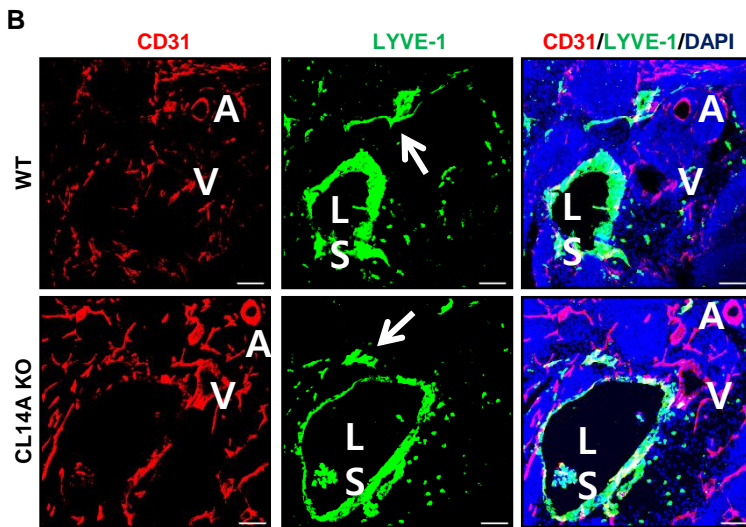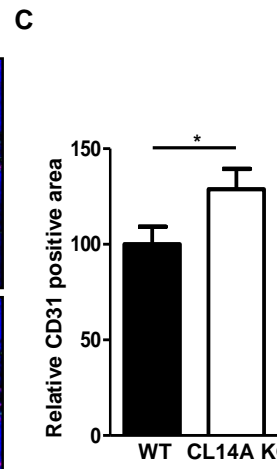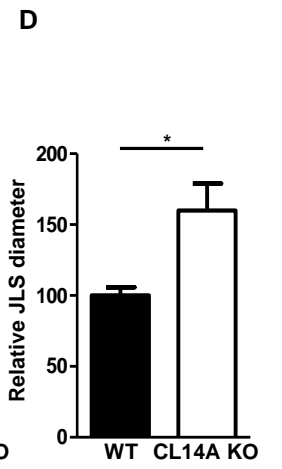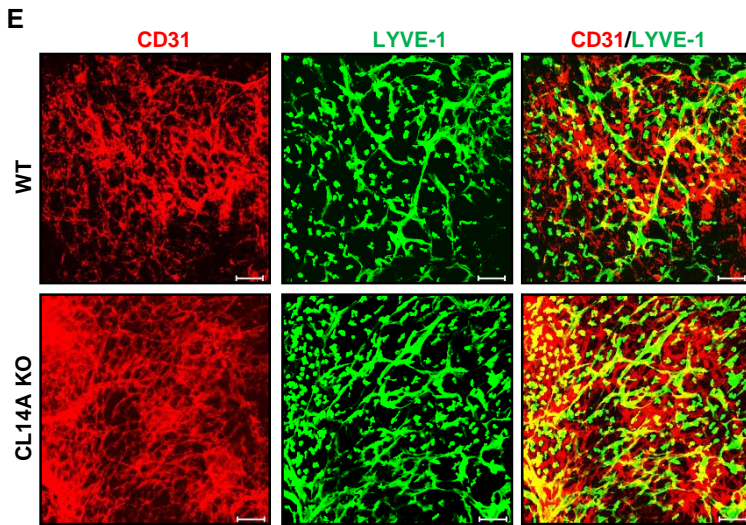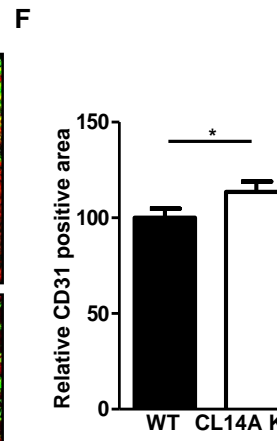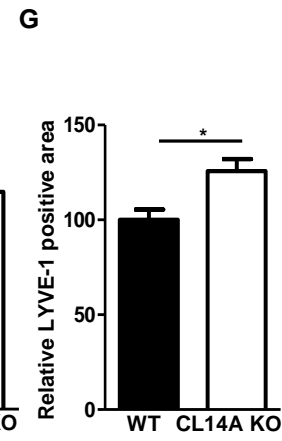

## Supplemental Figure 4

### Loss of CLEC14A increases blood and lymphatic vessel density and causes jugular lymph sac dilation

(A) Whole-mount staining of E11.5 WT and CLEC14A KO embryo forelimbs with CD31 and LYVE-1 antibodies demonstrating increased blood and lymphatic vessel density. n = 3 per group. (B) Transverse sections of E13.5 WT and CLEC14A KO embryos immunostained for CD31 and LYVE-1 demonstrating increased blood vessel density and jugular lymph sac diameter. n = 3 per group. Scale bar: 100  $\mu$ m. (C and D) Quantification of relative blood vessel density and jugular lymph sac diameter (% of control). Scale bar: 100  $\mu$ m. (E) Flat-mount staining of E13.5 WT and CLEC14A KO embryo forelimbs for CD31 and LYVE-1 demonstrating increased blood lymphatic vessel density. n = 3 per group. Scale bar: 100  $\mu$ m. (F and G) Quantification of relative blood vessel density and lymphatic vessel density (% of control). All experiments were repeated on at least 3 different sets of WT and KO littermates. \*, P < 0.05; \*\*, P < 0.005; \*\*\*, P < 0.0001 by paired, 2-tailed Student's *t* test. Error bars represent the mean  $\pm$  SD.



Supplemental Figure 5

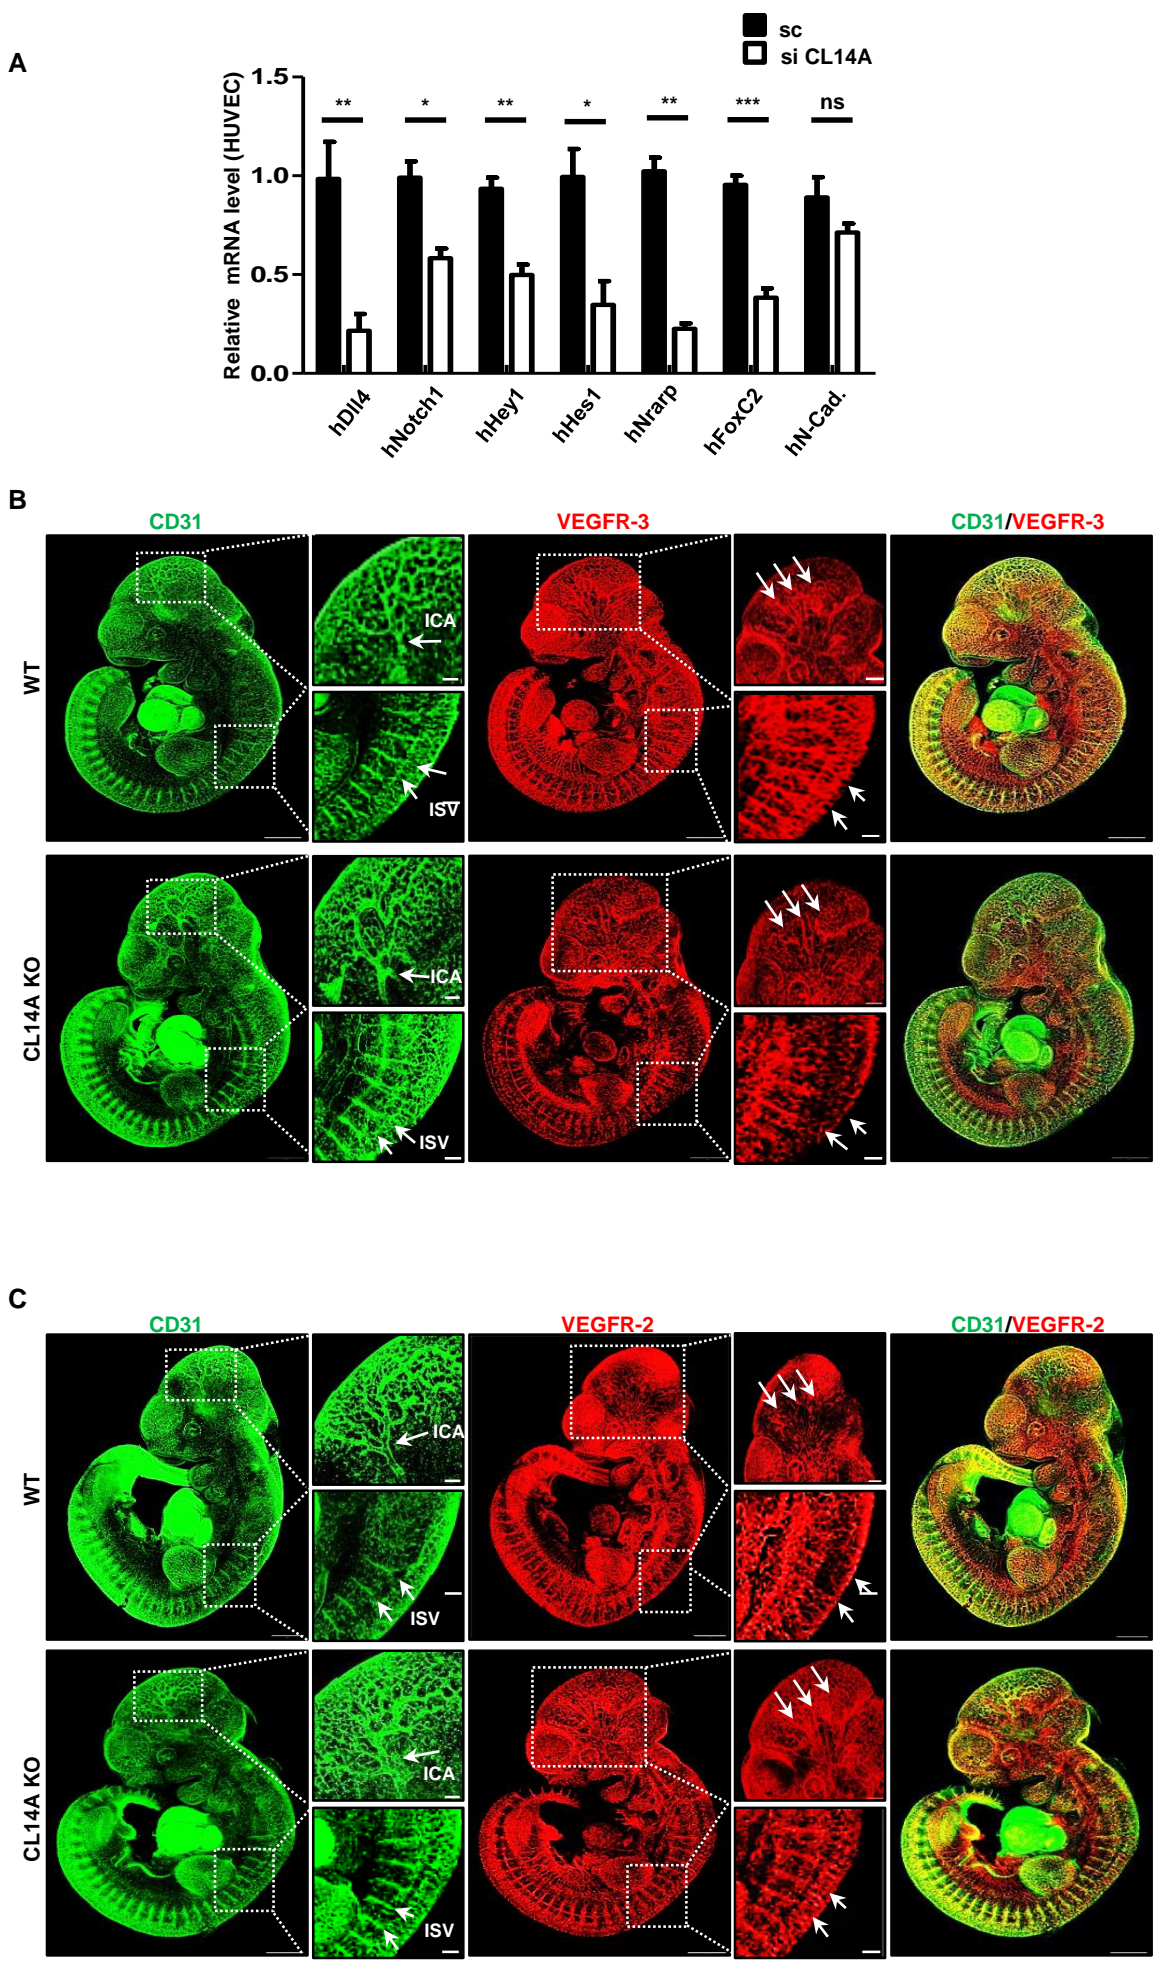

## Supplemental Figure 5

**CLEC14A deficiency alters the expression levels of Notch/Dll4 and downstream Notch target genes in HUVECs, and attenuates VEGFR-3 expression and promotes VEGFR-2 expression in E10.5 CLEC14A KO embryos**

(A) Relative GAPDH-normalised mRNA levels of Notch/Dll4 and Notch target genes in HUVECs following knockdown of CLEC14A. (B) Whole-mount staining of E10.5 WT and CLEC14A KO embryos with CD31 and VEGFR-3, demonstrating lower VEGFR-3 expression in the ICA and ISV (arrows) of KOs. n = 3 per group. (C) Whole-mount staining of E10.5 WT and CLEC14A KO embryos with CD31 and VEGFR-2, demonstrating higher VEGFR-2 expression in the ICA and ISA (arrows) of KOs. n = 3 per group. ICA, internal carotid artery; ISV, intersomitic vessels. Scale bar: 100  $\mu$ m. All experiments were repeated on at least 3 different sets of WT and KO littermates. Error bars represent the mean  $\pm$  SD.

# Supplemental Figure 6

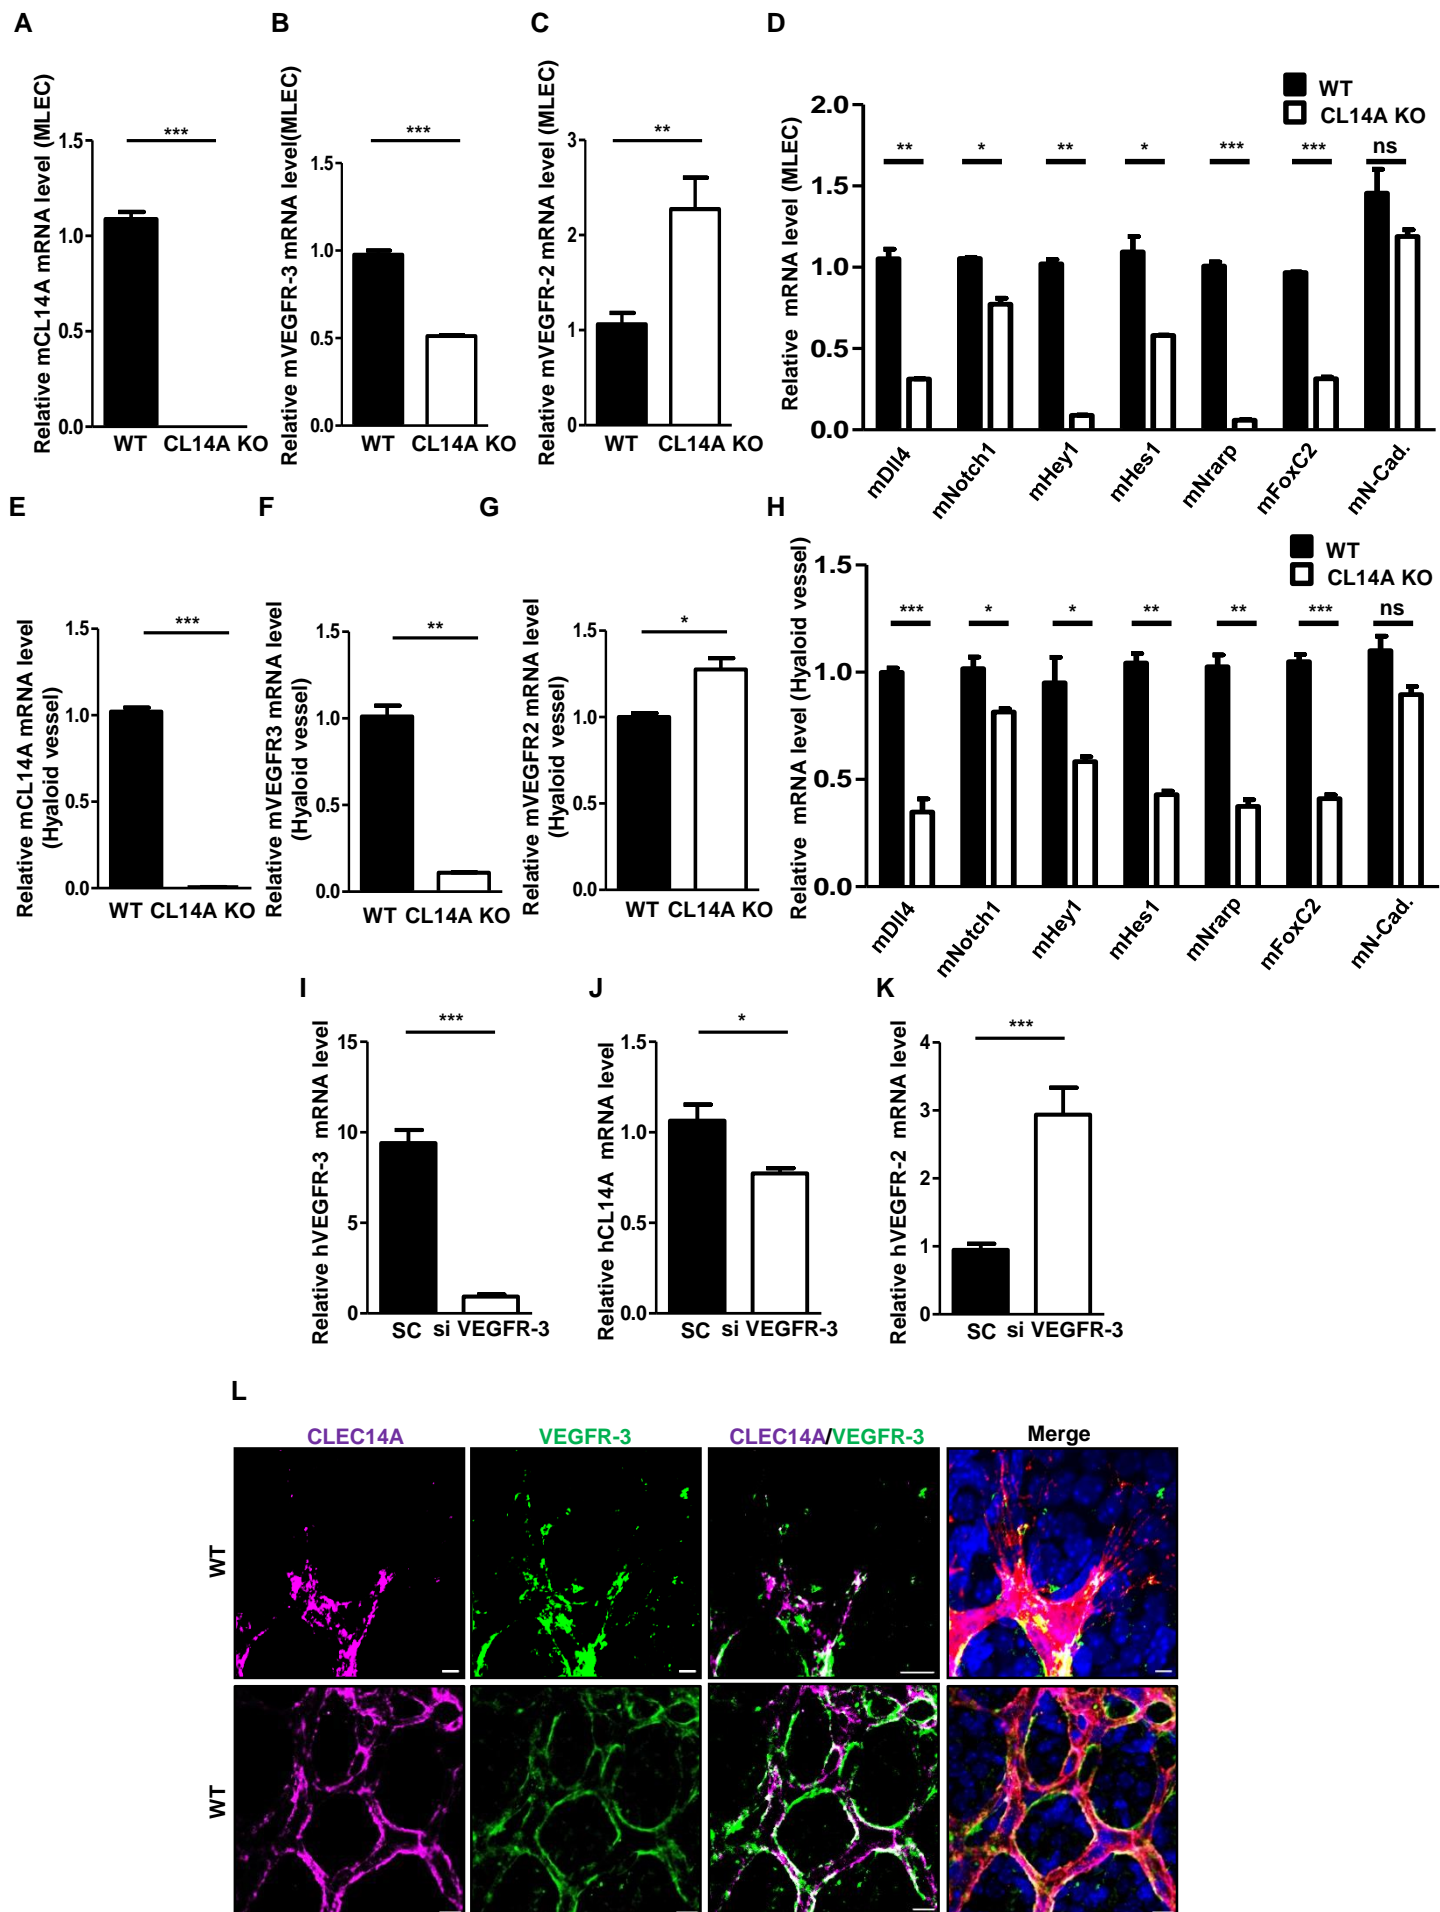

## Supplemental Figure 6

**CLEC14A deficiency alters the expression levels of VEGFR-3, VEGFR-2, Notch/Dll4 and downstream Notch target genes in murine lung EC and hyaloid vessels, and silencing of VEGFR-3 alters the expression levels of CLEC14A and VEGFR-2.**

(**A-D**) Relative GAPDH-normalised mRNA levels of CLEC14A, VEGFR-3, VEGFR-2, Notch/Dll4 and Notch target genes in murine lung ECs (MLECs) from WT and CLEC14A KO mice. n = 3 per group. (**E-H**) Relative GAPDH-normalised mRNA levels of CLEC14A, VEGFR-3, VEGFR-2, Notch/Dll4 and Notch target genes in hyaloid vessels from WT and CLEC14A KO mice. n = 3 per group. (**I-K**) Relative GAPDH-normalised mRNA levels of VEGFR-3, CLEC14A and VEGFR-2 after silencing of VEGFR-3. (**L**) Immunostaining for CLEC14A, VEGFR-3 and CD31 in retinas from WT mice at P5 demonstrating co-localisation of CLEC14A and VEGFR-3. n = 3 per group. All experiments were repeated on at least 4 different sets of WT and KO littermates. \*, P < 0.05; \*\*, P < 0.005; \*\*\*, P < 0.0001 by paired, 2-tailed Student's *t* test. Error bars represent the mean  $\pm$  SD.

**Supplemental Figure 7**

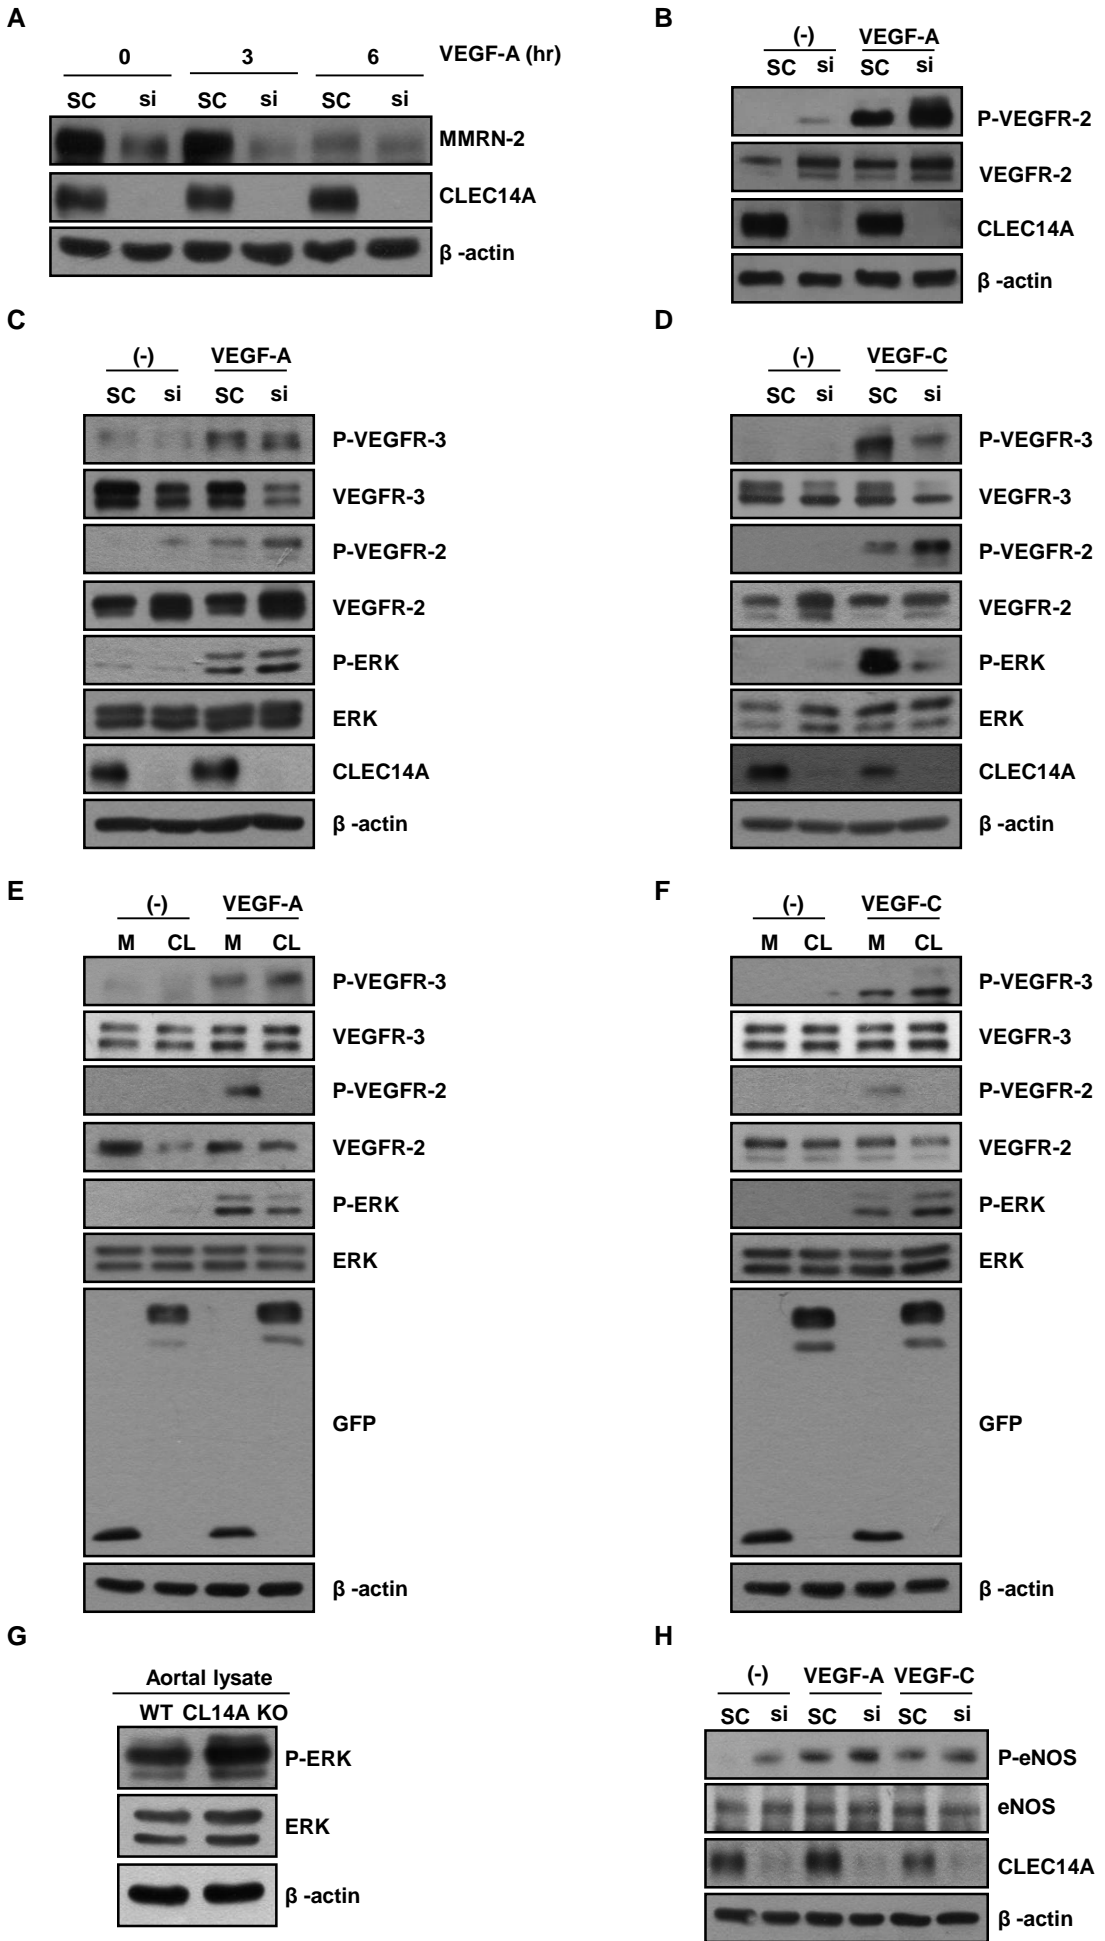

## Supplemental Figure 7

**CLEC14A deficiency results in decreased MMRN-2 and increased VEGFR-2 along with its downstream signalling while overexpression of CLEC14A reverses VEGFR-3 and VEGFR-2 signalling.**

(A) Time-dependent decreases in MMRN-2 expression following silencing of CLEC14A and treatment with VEGF-A (50 ng/mL) (B) Increased VEGFR-2 phosphorylation and VEGFR-2 expression in HUVEC lysates after CLEC14A silencing using siRNA (50nM) and 50 ng/mL VEGF-A treatment. (C) Decreased phosphoactivation and expression of VEGFR-3 and increased phosphoactivation and expression of VEGFR-2 following increase in the phosphoactivation of ERK in HDLECs after knockdown of CLEC14A using siRNA (50 nM) and stimulation with 50 ng/mL VEGF-A for 5 min (D) Decreased phosphoactivation and expression of VEGFR-3 following decrease in the phosphoactivation of ERK and increased phosphoactivation and expression of VEGFR-2 in HDLECs after knockdown of CLEC14A using siRNA (50 nM) and treatment with 100 ng/mL VEGF-C for 15 min (E) Elevated phosphoactivation and expression of VEGFR-3 and reduced phosphoactivation and expression of VEGFR-2 following decrease in phosphoactivation of ERK in HDLECs after overexpression of GFP-tagged CLEC14A together with VEGF-A (50 ng/mL) for 5 min (GFP-Mock and GFP-CLEC14A-FL). (F) Enhanced phosphoactivation and expression of VEGFR-3 following increase in phosphoactivation of ERK and decreased phosphoactivation and expression of VEGFR-2 after overexpression of GFP-tagged CLEC14A together with VEGF-C (100 ng/mL) treatment for 15 min in HDLECs (GFP-Mock and GFP-CLEC14A-FL). (G) Increased ERK phosphorylation in P6 CLEC14A KO aorta lysate. n = 3 per group. (E) Increased eNOS phosphorylation upon silencing of CLEC14A with the treatment of VEGF-A or -C (VEGF-A: 50 ng/mL, VEGF-C: 100 ng/mL). All experiments were repeated at least 3 different sets.

A

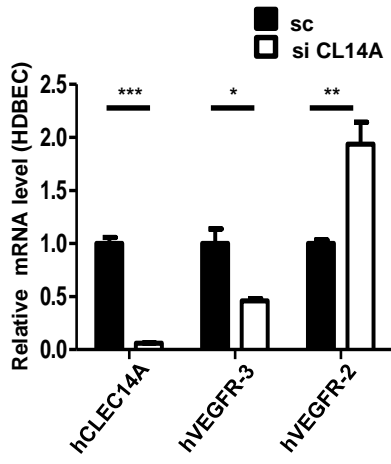

B

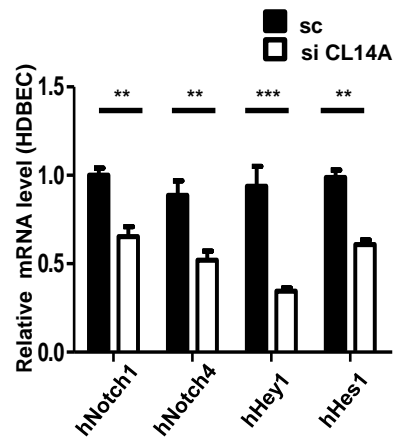

C

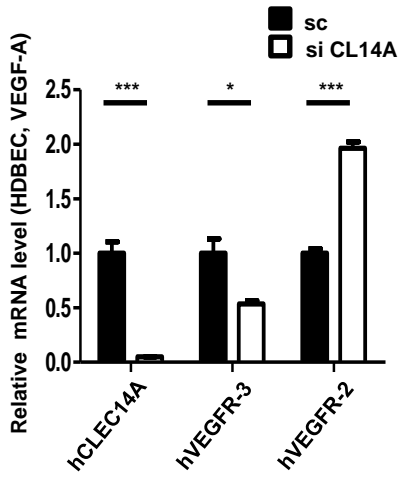

D

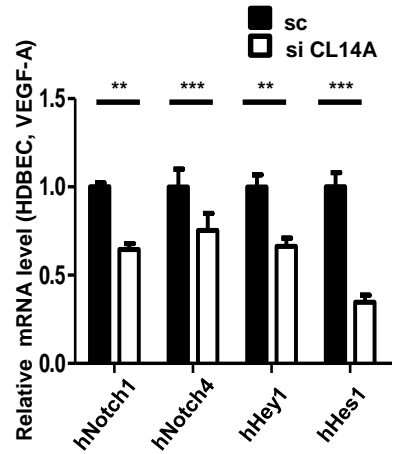

E

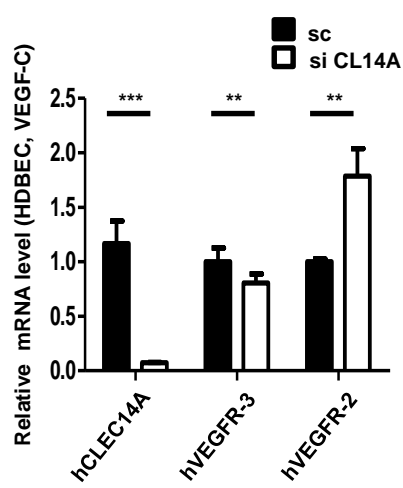

F

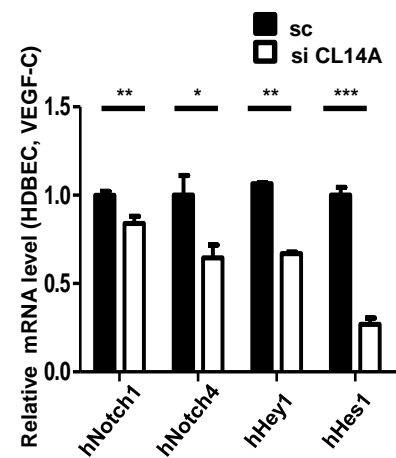

## Supplemental Figure 8

**Upon VEGF-A and VEGF-C treatment, silencing of CLEC14A changes the expression levels of VEGFR-3, VEGFR-2, Notch and Notch target genes in HDBECs**

(**A** and **B**) Relative GAPDH-normalised mRNA levels of CLEC14A, VEGFR-3 and VEGFR-2, Notch and Notch target genes after CLEC14A silencing in HDBECs. (**C** and **D**) Relative GAPDH-normalised mRNA levels of CLEC14A, VEGFR-3, VEGFR-2, Notch and Notch target genes in HDBECs following treatment of VEGF-A (50 ng/mL) (**E** and **F**) Relative GAPDH-normalised mRNA levels of CLEC14A, VEGFR-3, VEGFR-2, Notch and Notch target genes in HDBECs following treatment of VEGF-C (100 ng/mL). \*,  $P < 0.05$ ; \*\*,  $P < 0.005$ ; \*\*\*,  $P < 0.0001$  by paired, 2-tailed Student's *t* test. All experiments were repeated at least 3 different sets. Error bars represent the mean  $\pm$  SD.



Supplemental Figure 9

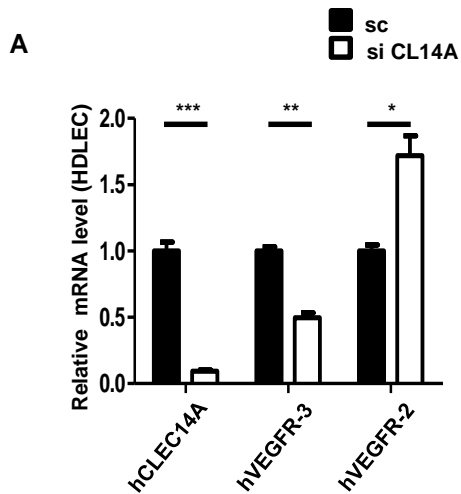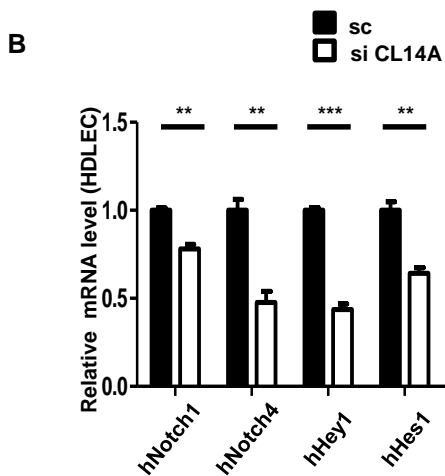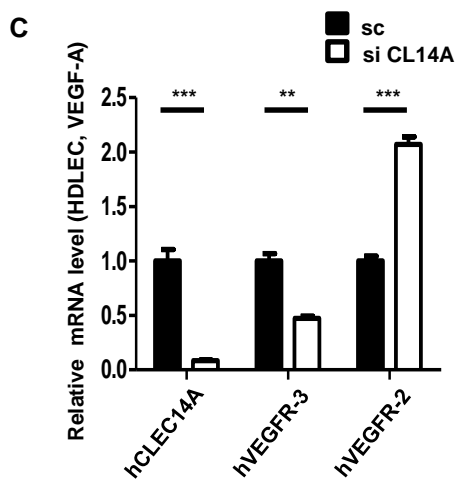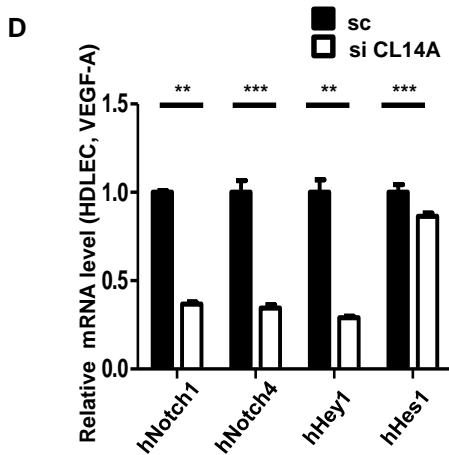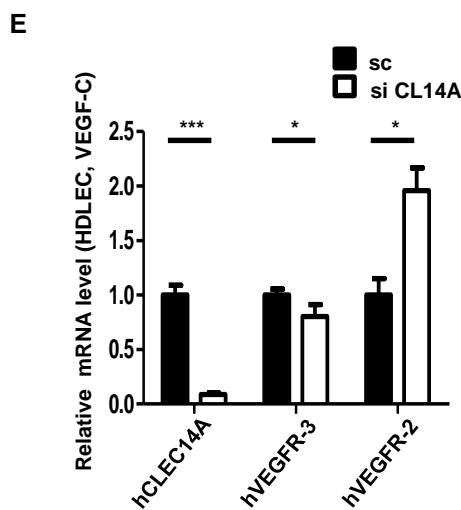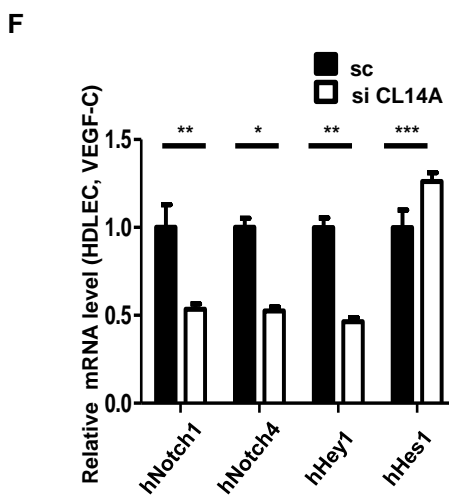

## Supplemental Figure 9

**Upon VEGF-A and VEGF-C treatment, silencing of CLEC14A changes the expression levels of VEGFR-3, VEGFR-2, Notch and Notch target genes in HDLECs**

(**A** and **B**) Relative GAPDH-normalised mRNA levels of CLEC14A, VEGFR-3 and VEGFR-2, Notch and Notch target genes after CLEC14A silencing in HDLECs. (**C** and **D**) Relative GAPDH-normalised mRNA levels of CLEC14A, VEGFR-3, VEGFR-2, Notch and Notch target genes in HDLECs following treatment of VEGF-A (50 ng/mL) (**E** and **F**) Relative GAPDH-normalised mRNA levels of CLEC14A, VEGFR-3, VEGFR-2, Notch and Notch target genes in HDLECs following treatment of VEGF-C (100 ng/mL). \*,  $P < 0.05$ ; \*\*,  $P < 0.005$ ; \*\*\*,  $P < 0.0001$  by paired, 2-tailed Student's *t* test. All experiments were repeated at least 3 different sets. Error bars represent the mean  $\pm$  SD.

Supplemental Figure 10

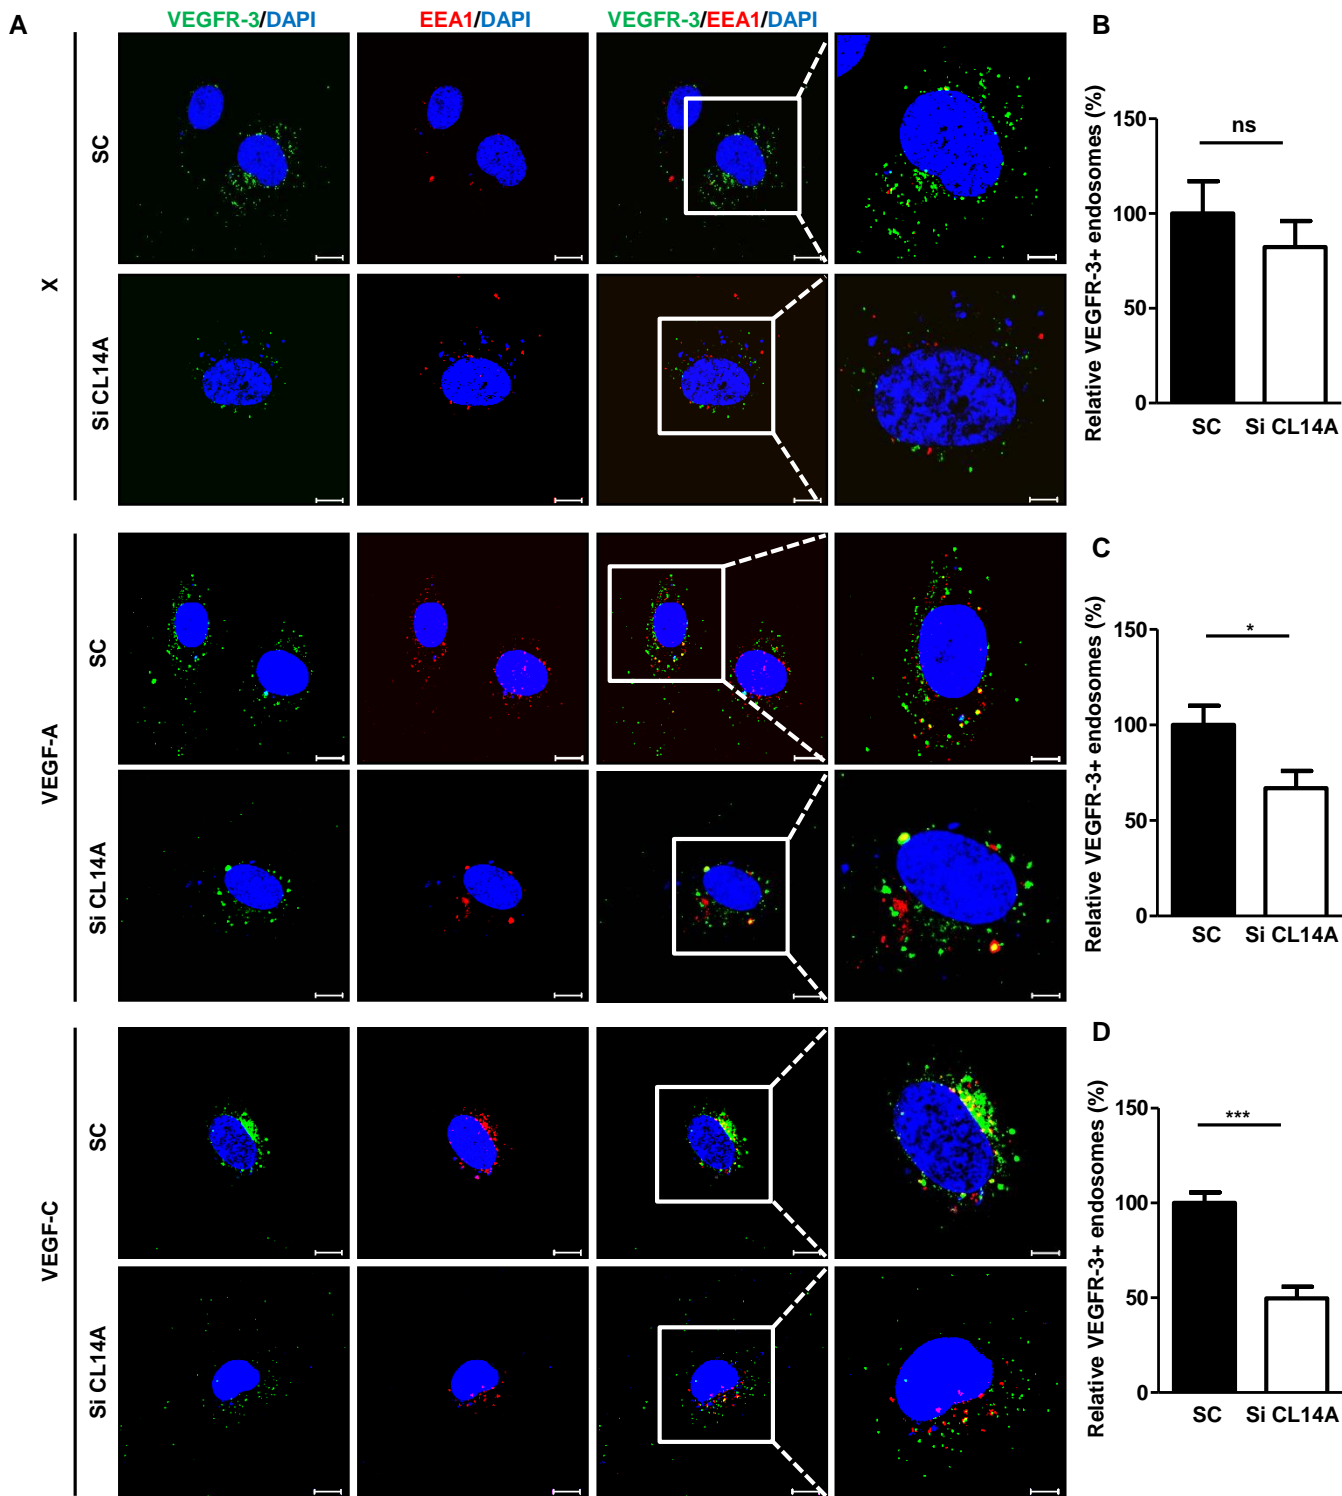

## Supplemental Figure 10

### Knockdown of CLEC14A reduces the internalization of VEGFR-3 after exposure to VEGF-C in HDBECs

(A) Immunocytochemical staining of VEGFR-3 and EEA1 in untreated, VEGF-A-treated (50 ng/mL), and VEGF-C-treated cells (100 ng/mL) demonstrating reduced internalization of VEGFR-3 after VEGF-C treatment. Scale bar: 10  $\mu$ m and 5  $\mu$ m for enlarged images. (B-D) Quantification of the percent internalization of VEGFR-3 after exposure to no ligand, VEGF-A-, or VEGF-C-. All experiments were repeated at least 3 different sets. \*,  $P < 0.05$ ; \*\*,  $P < 0.005$ ; \*\*\*,  $P < 0.0001$  by paired, 2-tailed Student's  $t$  test. Error bars represent the mean  $\pm$  SD.

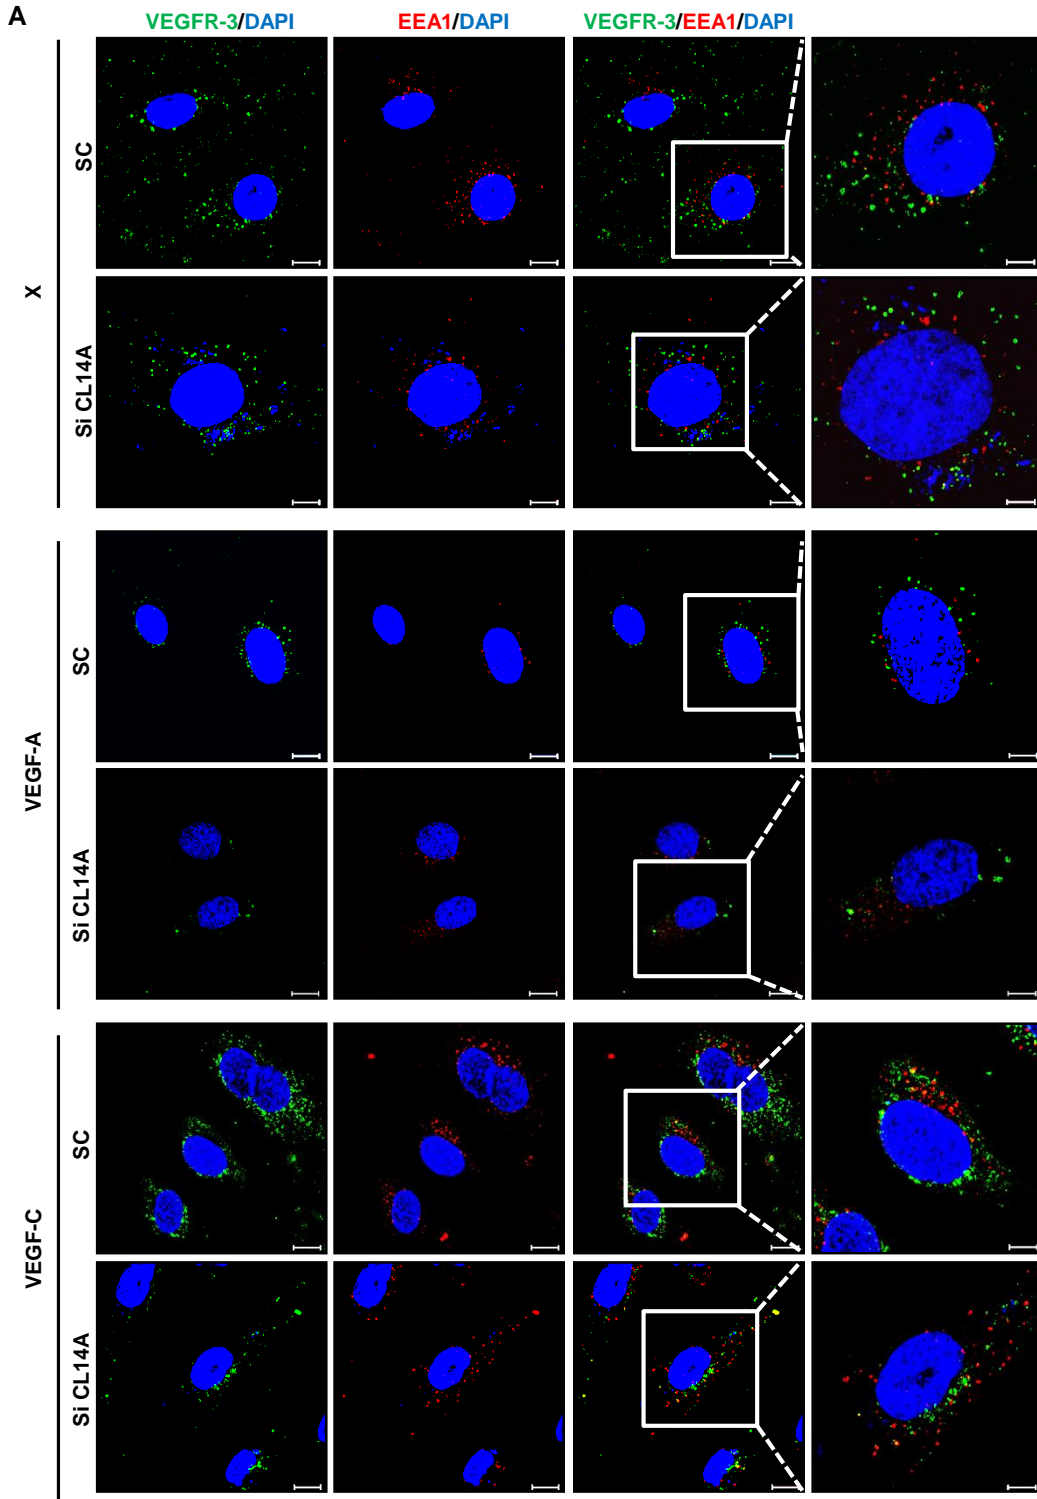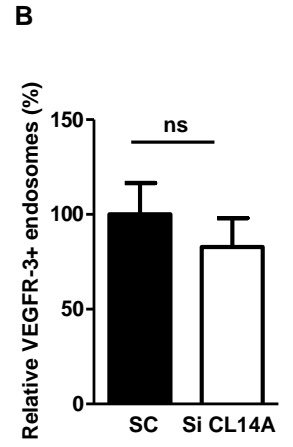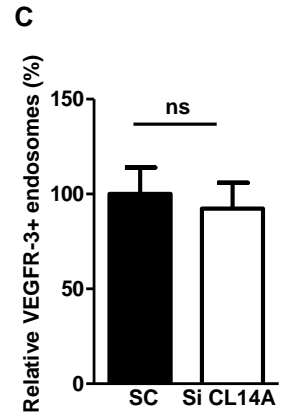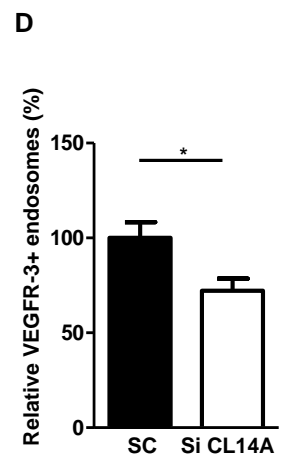

## Supplemental Figure 11

### Knockdown of CLEC14A reduces the internalization of VEGFR-3 after exposure to VEGF-C in HDLECs

(A) Immunocytochemical staining of VEGFR-3 and EEA1 in untreated, VEGF-A-treated (50 ng/mL), and VEGF-C-treated cells (100 ng/mL) demonstrating reduced internalization of VEGFR-3 after VEGF-C treatment. Scale bar: 10  $\mu$ m and 5  $\mu$ m for enlarged images. (B-D) Quantification of the percent internalization of VEGFR-3 after exposure to no ligand, VEGF-A-, or VEGF-C-. All experiments were repeated at least 3 different sets. \*,  $P < 0.05$ ; \*\*,  $P < 0.005$ ; \*\*\*,  $P < 0.0001$  by paired, 2-tailed Student's  $t$  test. Error bars represent the mean  $\pm$  SD.

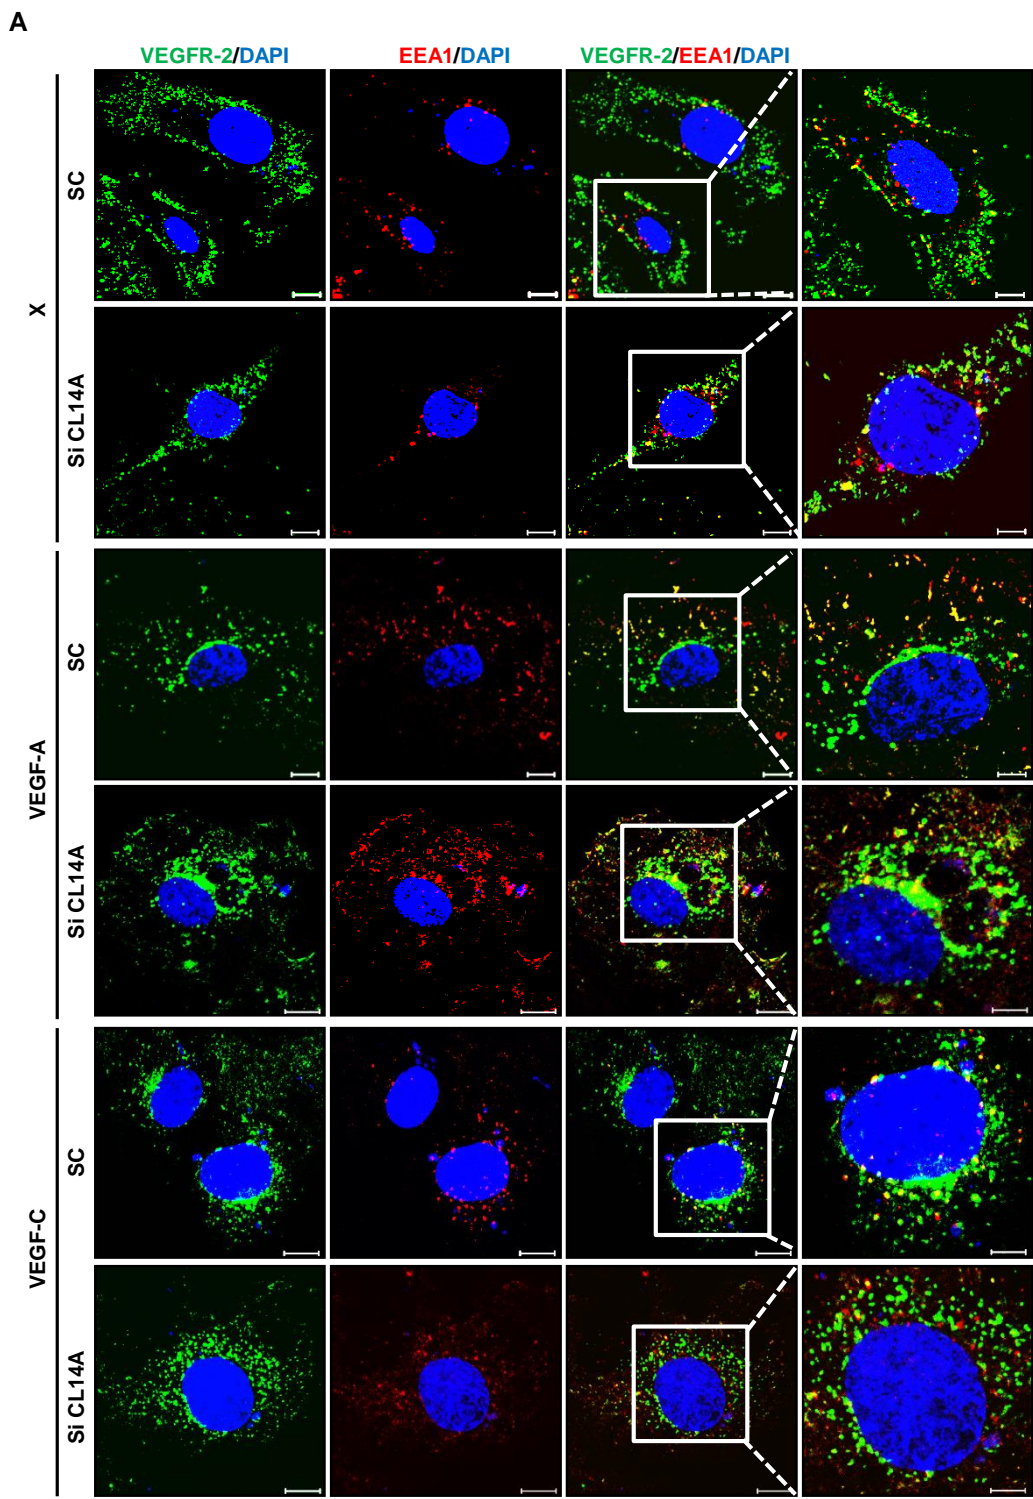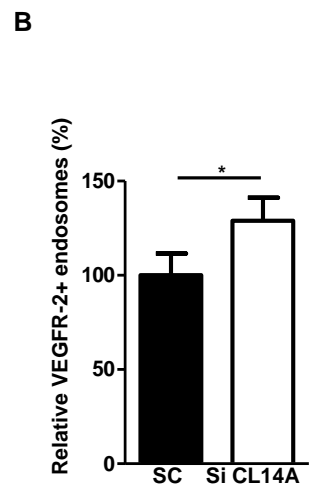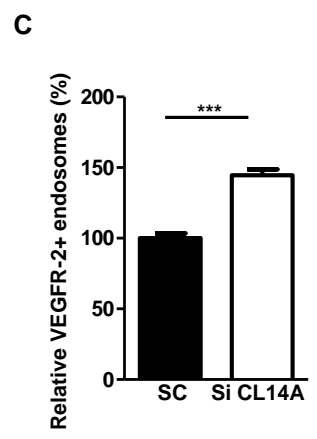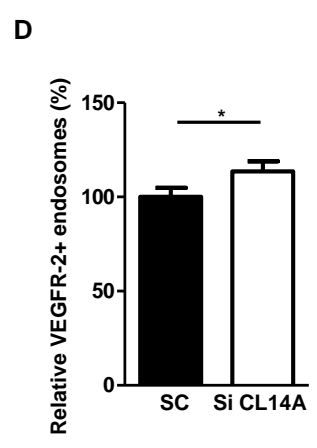

## Supplemental Figure 12

### Knockdown of CLEC14A enhances the internalization of VEGFR-2 after exposure to VEGF-A in HDBECs

(A) Immunocytochemical staining of VEGFR-2 and EEA1 in untreated, VEGF-A-treated (50 ng/mL), and VEGF-C-treated cells (100 ng/mL) demonstrating reduced internalization of VEGFR-2 after VEGF-A treatment. Scale bar: 10  $\mu$ m and 5  $\mu$ m for enlarged images. (B-D) Quantification of the percent internalization of VEGFR-2 after exposure to no ligand, VEGF-A-, or VEGF-C-. All experiments were repeated at least 3 different sets. \*,  $P < 0.05$ ; \*\*,  $P < 0.005$ ; \*\*\*,  $P < 0.0001$  by paired, 2-tailed Student's  $t$  test. Error bars represent the mean  $\pm$  SD.



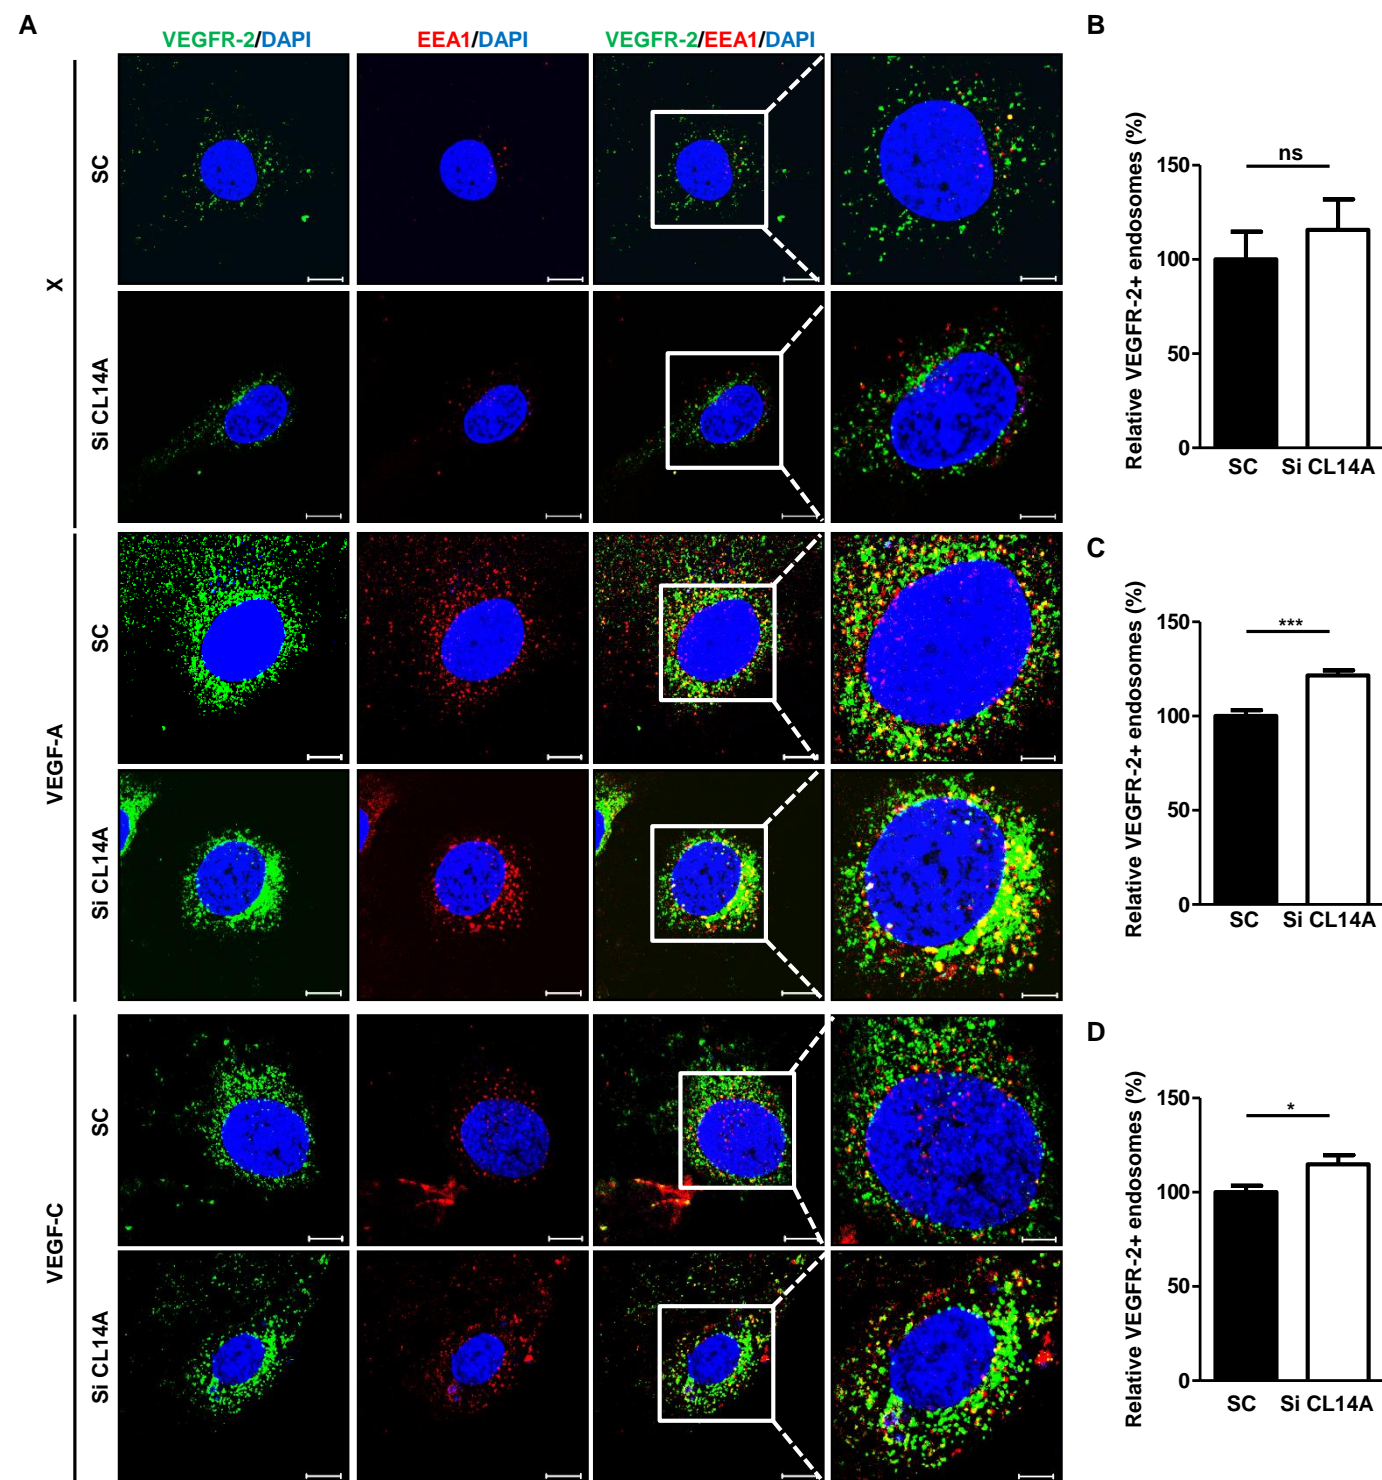

### Supplemental Figure 13

#### Knockdown of CLEC14A enhances the internalization of VEGFR-2 after exposure to VEGF-A in HDLECs

(A) Immunocytochemical staining of VEGFR-2 and EEA1 in untreated, VEGF-A-treated (50 ng/mL), and VEGF-C-treated cells (100 ng/mL) demonstrating reduced internalization of VEGFR-2 after VEGF-A treatment. Scale bar: 10  $\mu$ m and 5  $\mu$ m for enlarged images. (B-D) Quantification of the percent internalization of VEGFR-2 after exposure to no ligand, VEGF-A-, or VEGF-C-. All experiments were repeated at least 3 different sets. \*,  $P < 0.05$ ; \*\*,  $P < 0.005$ ; \*\*\*,  $P < 0.0001$  by paired, 2-tailed Student's  $t$  test. Error bars represent the mean  $\pm$  SD.

# Supplemental Figure 14

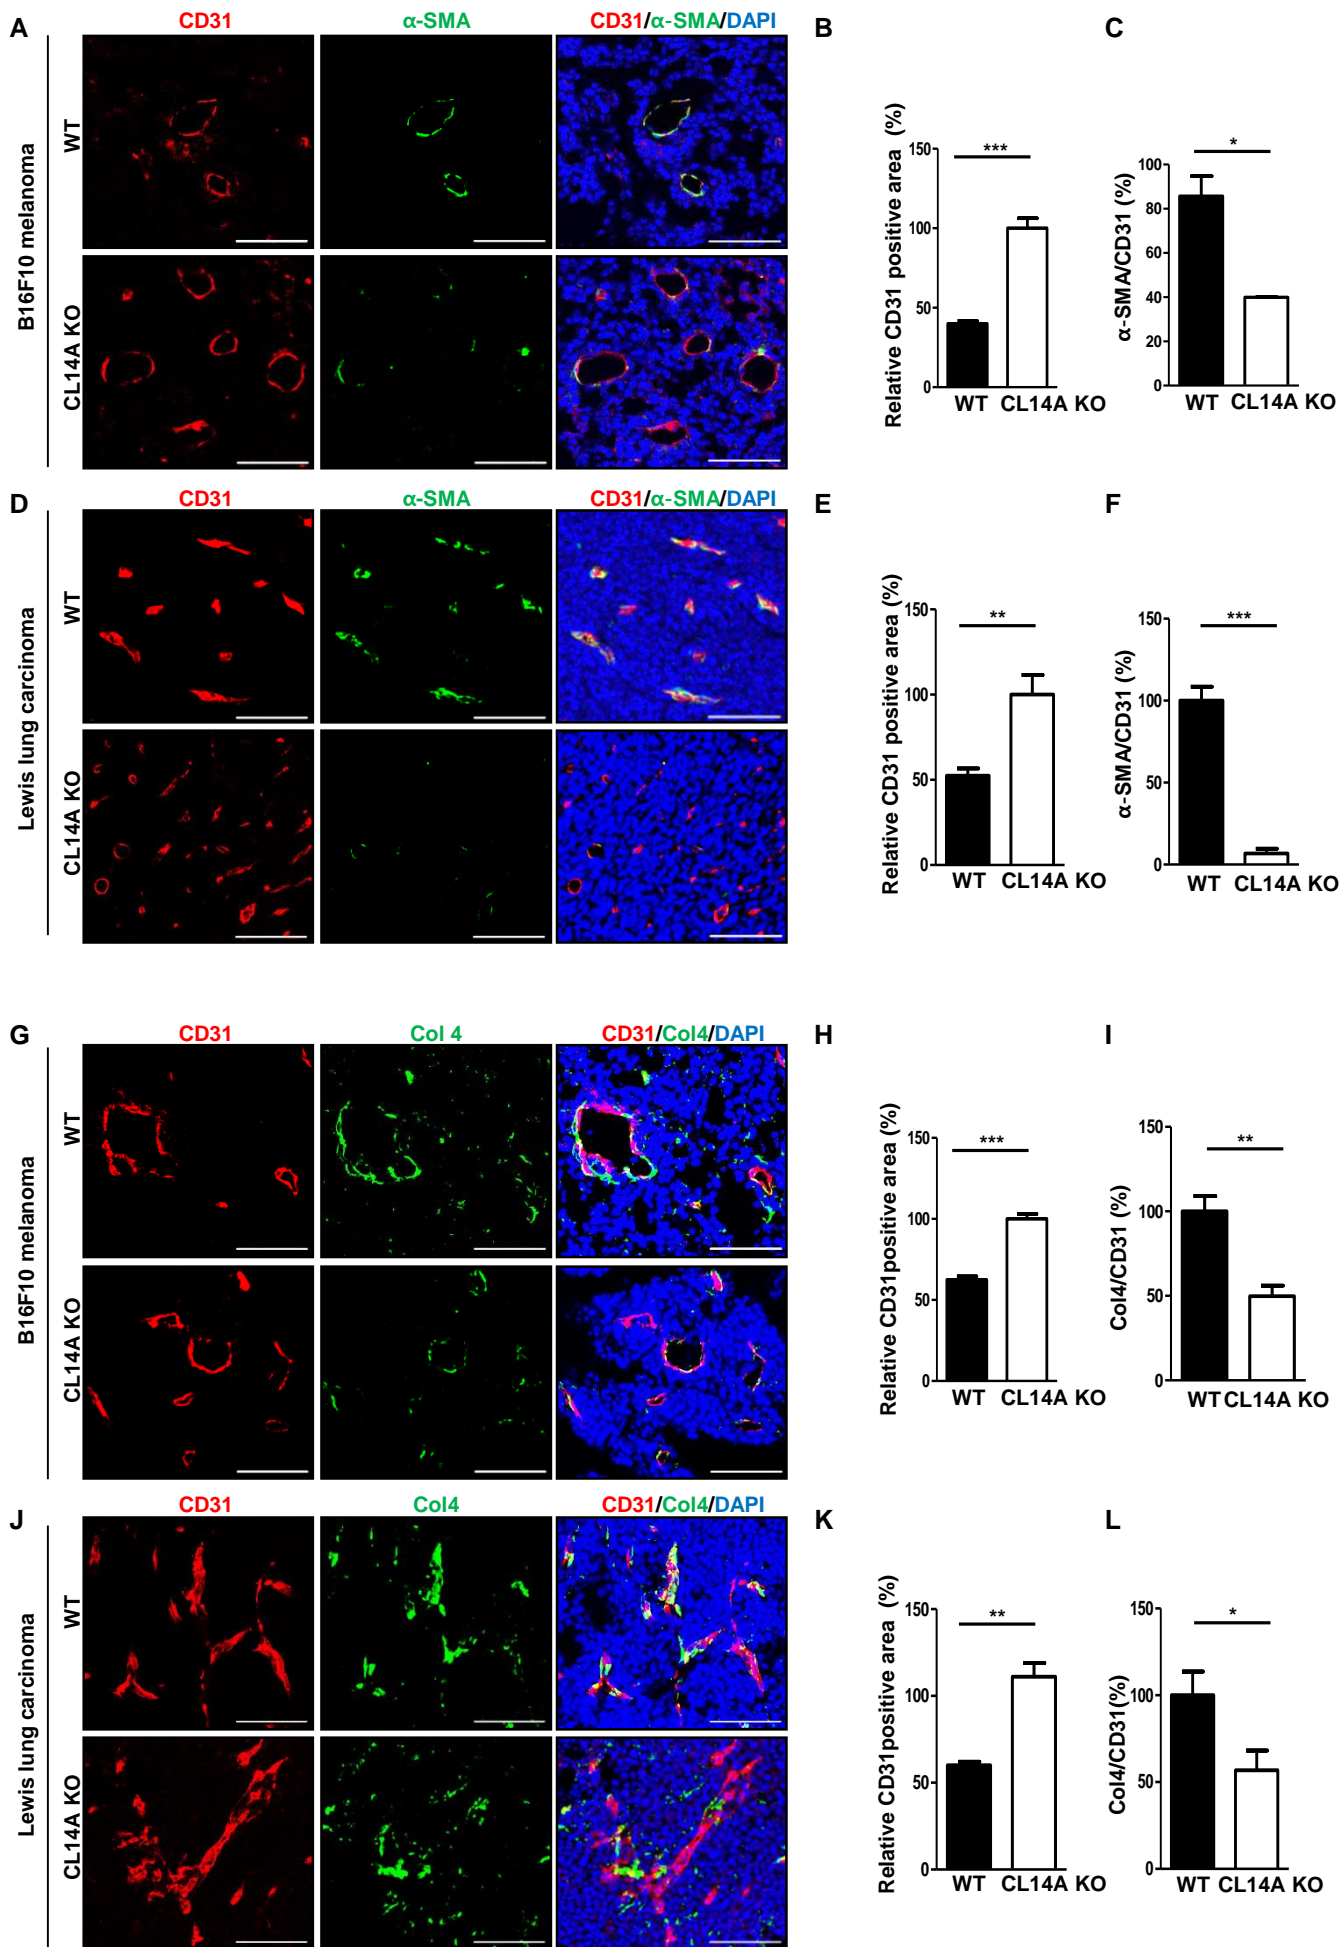

## Supplemental Figure 14

### **CLEC14A deficiency leads to increased tumor angiogenesis and vascular abnormalities**

(A) CD31 and  $\alpha$ -SMA staining of B16F10 tumors grown in WT and CLEC14A KO mice. n = 6 per group. (B and C) Quantification of the CD31-positive area and the  $\alpha$ -SMA:CD31 ratio (%). (D) CD31 and  $\alpha$ -SMA staining of LLC tumors grown in WT and CLEC14A KO mice. n = 6 per group. (E and F) Quantification of the CD31-positive area and  $\alpha$ -SMA:CD31 ratio. (G) CD31 and collagen type IV (Col4) staining of B16F10 tumors grown in WT and CLEC14A KO mice. n = 6 per group. (H and I) Quantification of the CD31-positive area and Col4:CD31 ratio. (J) CD31 and Col4 staining of LLC tumors grown in WT and CLEC14A KO mice. n = 6 per group. (K and L) Quantification of the CD31-positive area and Col4:CD31 ratio. Scale bar: 100  $\mu$ m. n = 6 per group. \*, P < 0.05; \*\*, P < 0.005; \*\*\*, P < 0.0001 by paired, 2-tailed Student's *t* test. Error bars represent the mean  $\pm$  SD.

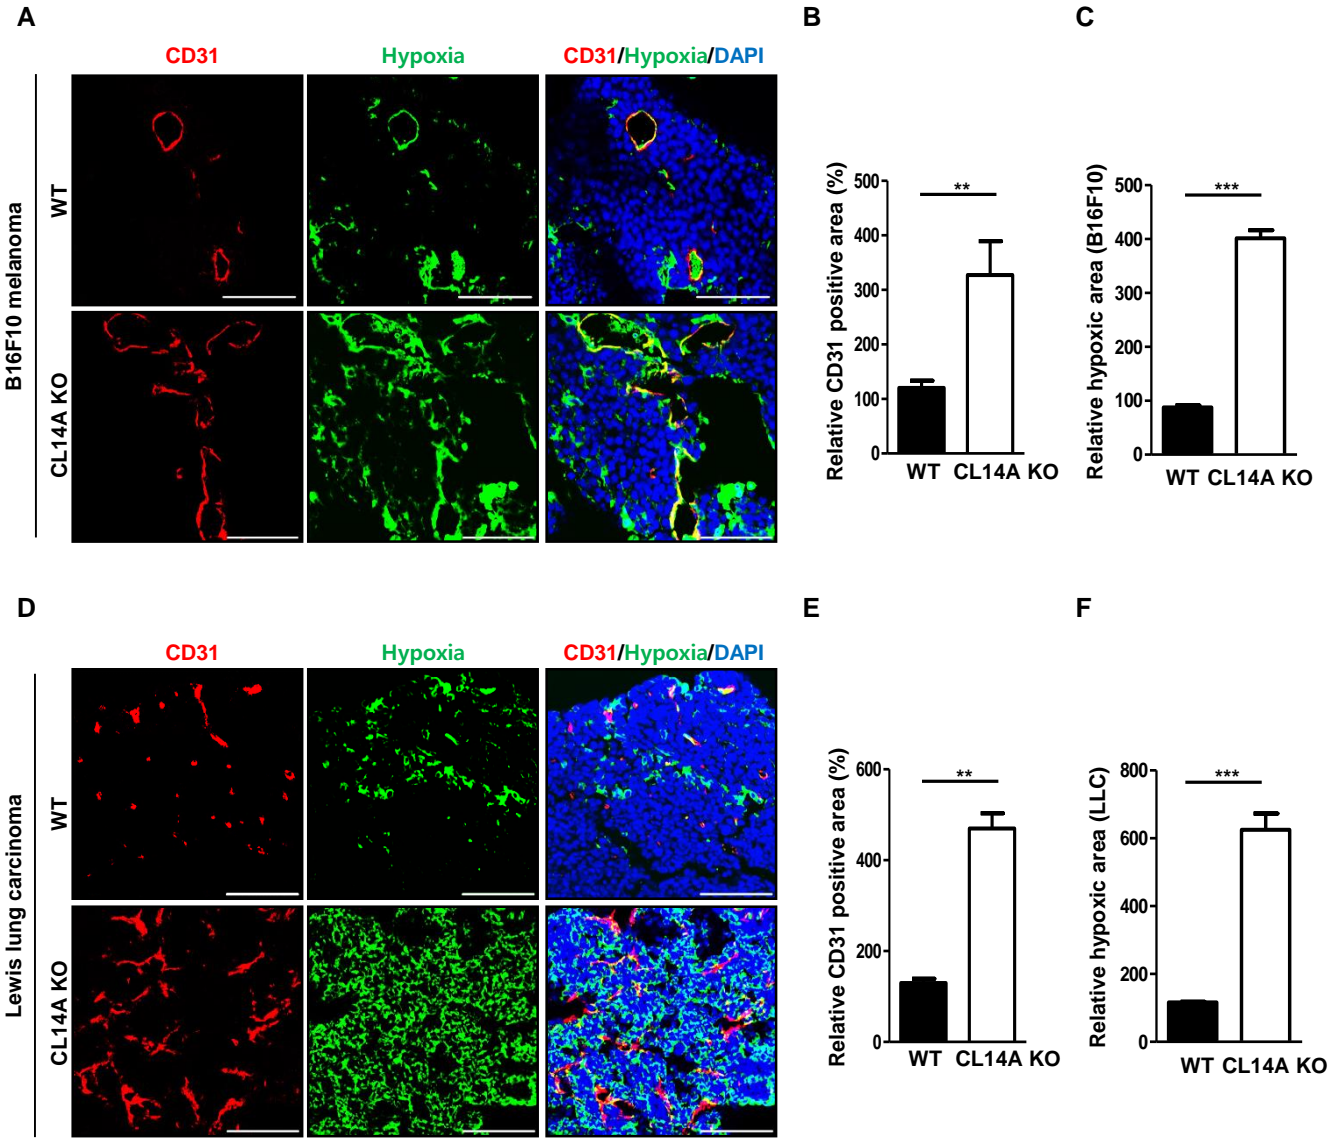

## Supplemental Figure 15

### Elevated hypoxia in B16F10 and LLC of CLEC14A KO mice

(A) CD31 and hypoxyprobe staining of B16F10 tumors grown in WT and CLEC14A KO mice. n = 6 per group. (B and C) Quantification of the CD31-positive area and relative hypoxic area (%). (D) CD31 and hypoxyprobe staining of LLC tumors grown in WT and CLEC14A KO mice. n = 6 per group. (E and F) Quantification of the CD31-positive area and relative hypoxic area (%). Scale bar: 100  $\mu$ m. \*, P < 0.05; \*\*, P < 0.005; \*\*\*, P < 0.0001 by paired, 2-tailed Student's *t* test. Error bars represent the mean  $\pm$  SD.

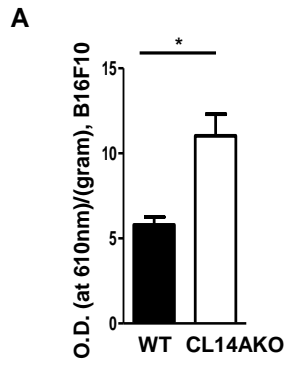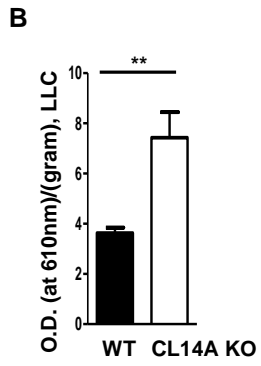

## Supplemental Figure 16

### Increased extravasation of the dye in tumors grown in CLEC14A KO mice

(A) Quantification of extravasated Evans blue in B16F10 tumors (O.D. at 610 nm per gram of tissue). (B) Quantification of extravasated Evans blue in LLC tumors (O.D. at 610 nm per gram of tissue). n = 6 per group. \*, P < 0.05; \*\*, P < 0.005; \*\*\*, P < 0.0001 by paired, 2-tailed Student's *t* test. Error bars represent the mean  $\pm$  SD.



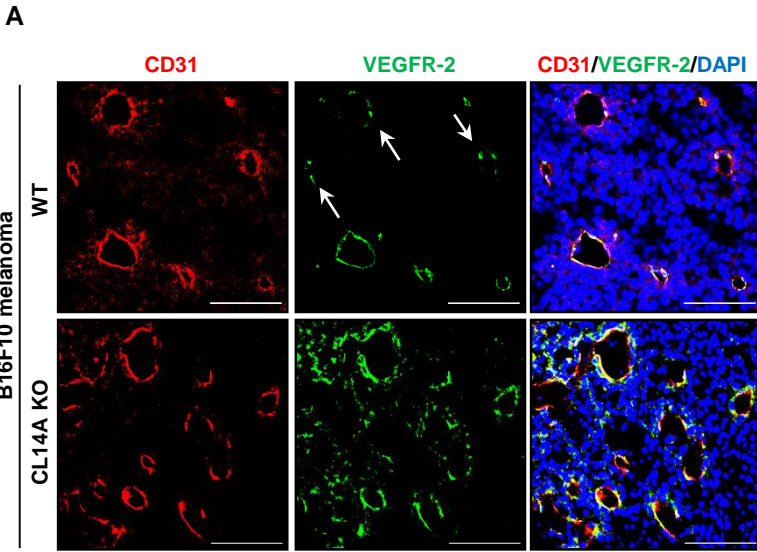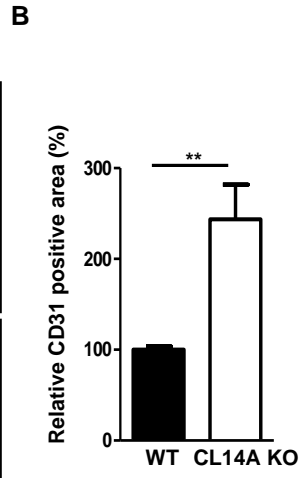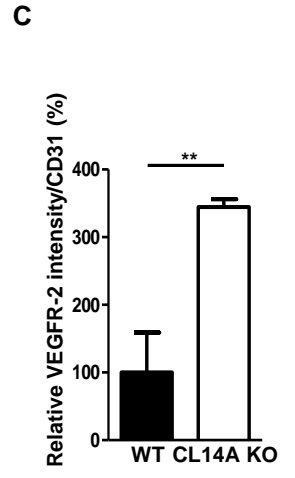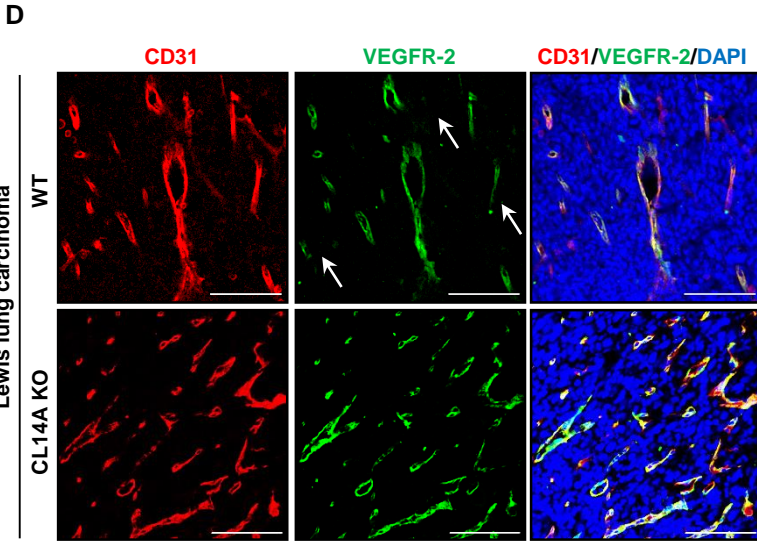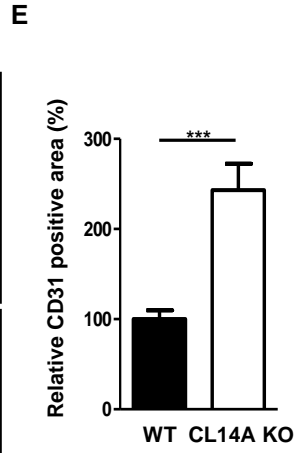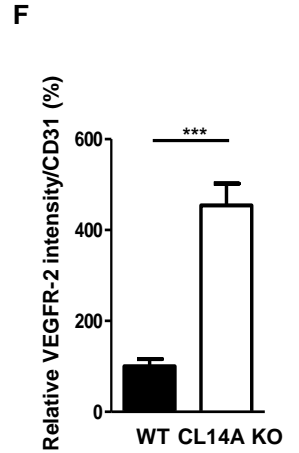

## Supplemental Figure 17

### **CLEC14A deficiency increased VEGFR-2 expression in B16F10 and LLC tumors**

(A) Immunostaining for CD31 and VEGFR-2 in B16F10 tumors grown in WT and CLEC14A KO mice. n = 6 per group. (B and C) Quantification of the CD31-positive area and relative VEGFR-2 intensity (normalised to CD31 intensity) in B16F10 tumors (% of control). (D) CD31 and VEGFR-2 immunostaining of LLC tumors grown in WT and CLEC14A KO mice. n = 6 per group. (E and F) Quantification of CD31 and relative VEGFR-2 intensity (normalised to CD31 intensity) in LLC tumors (% of control). White arrows indicate weak expression of VEGFR-2. Scale bar: 100  $\mu$ m. \*, P < 0.05; \*\*, P < 0.005; \*\*\*, P < 0.0001 by paired, 2-tailed Student's *t* test. Error bars represent the mean  $\pm$  SD.

A

Endogenous CLEC14A

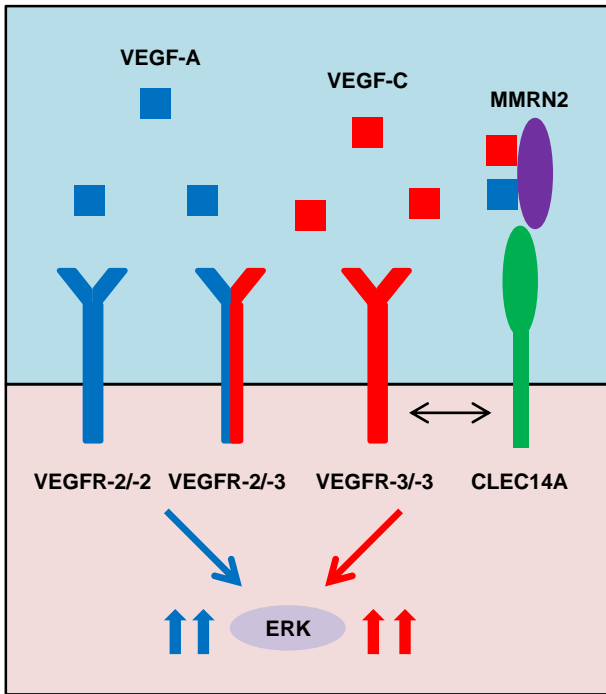

• Balancing of VEGFR-3 & VEGFR-2  
(vessel homeostasis)

B

Loss of CLEC14A

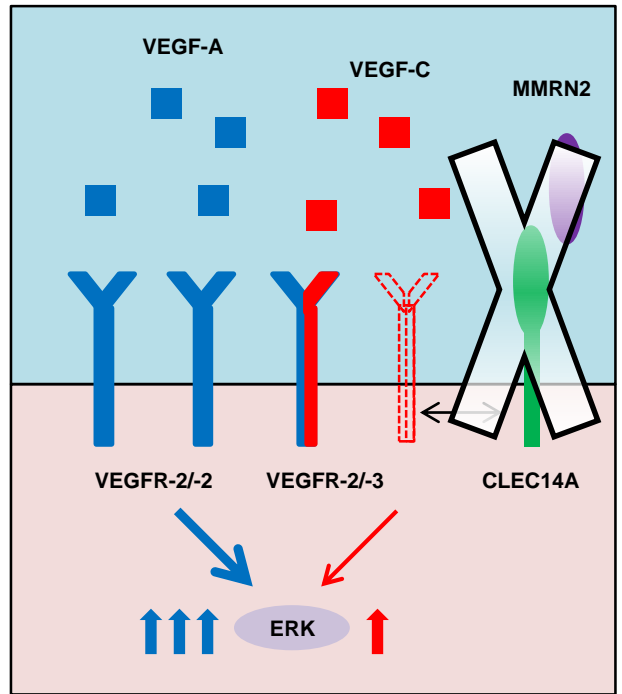

- VEGFR-3↓, NOTCH target genes ↓ & VEGFR-2↑
  - VEGFR-3-mediated-ERK ↓
  - VEGFR-2-mediated-ERK ↑
- Blood&lymphatic vessel density ↑
  - Haemorrhage ↑
- Survival of tumour bearing mice ↓

## Supplemental Figure 18

### Schematic diagram: the role of CLEC14A

(A) CLEC14A balances VEGFR-3 and VEGFR-2 signaling and expression, modulating blood and lymphatic vessel homeostasis. (B) CLEC14A deletion results in reduced VEGFR-3 and increased VEGFR-2 phosphorylation and expression, showing abnormal blood and lymphatic vasculature during development and in pathological conditions.

**Supplemental Table 1 Primer sequences used for genotyping confirmation**

| <b>Gene</b>               | <b>Sequence</b>            |
|---------------------------|----------------------------|
| <b>mCLEC14A-neo-fwd</b>   | 5`-TCATTCTCAGTATTGTTTTG-3` |
| <b>mCLEC14A-rev-SD</b>    | 5`-GAATAGGAAAATGTCTCTTG-3` |
| <b>mCLEC14A-intra-fwd</b> | 5`-GAGCATAGCAGTTATCGTTT-3` |

**Supplemental Table 2 Primer sequences used for Q-PCR analysis of WT and CLEC14A KO mice**

| <b>Gene</b>               | <b>Sequence</b>             |
|---------------------------|-----------------------------|
| <b>mCLEC14A-5'UTR-fwd</b> | 5`-TTCCTTTTCCAGGGTTTGTG;-3` |
| <b>mCLEC14A-5'UTR-rev</b> | 5`-GCCTACAAGGTGGCTTGAAT-3`  |
| <b>mCLEC14A-CDS-fwd</b>   | 5`-AAGCTGTGCTCCTGCTCTTG-3`  |
| <b>mCLEC14A-CDS-rev</b>   | 5`-TCCTGAGTGCACTGTGAGATG-3` |
| <b>mCLEC14A-3'UTR-fwd</b> | 5`-CTGTAGAGGGCGGTGACTTT-3`  |
| <b>mCLEC14A-3'UTR-rev</b> | 5`-AGCTGCTCCCAAGTCCTCT-3`   |

**Supplemental Table 3 Primer sequences used for real time PCR**

| <b>Gene</b>     | <b>Forward (5`-&gt;3`)</b> | <b>Reverse (5`-&gt;3`)</b> |
|-----------------|----------------------------|----------------------------|
| <b>hGAPDH</b>   | CGCCACAGTTTCCCGGAGGG       | CCCTCCAAAATCAAGTGGGG       |
| <b>hCLEC14A</b> | CTGGGACCGAGGTGA            | CGCGATGCAAGTAACTGAGA       |
| <b>hVEGFR-2</b> | CTACCTCACCTGTTTCCTGTATG    | GTCCGTCTGGTTGTCATCTG       |
| <b>hVEGFR-3</b> | CCACACAGAACTCTCCAGCA       | ACAATGACCTCGGTGCTCTC       |
| <b>hDII4</b>    | TGGGTCAGAACTGGTTATTGGA     | GTCATTGCGCTTCTTGACAG       |
| <b>hNotch1</b>  | CACTGTGGGCGGGTCC           | GTTGTATTGGTTCGGCACCAT      |
| <b>hHey1</b>    | GAGAAGCAGGGATCTGCTAA       | CCCAAACCTCCGATAGTCCAT      |
| <b>hHes1</b>    | CGGACATTCTGGAAATGA CA      | CATTGATCTGGGTCATGCAG       |
| <b>hNrarp</b>   | TGAAGCTGCTGGTCAAGTTC       | TAGTTGGCGGGAAGGTACAG       |
| <b>hFoxC2</b>   | GCAACCCAACAGCAAACCTTC      | GACGGCGTAGCTCGATAGG        |
| <b>mGAPDH</b>   | CAACGACCCCTTCATTGACC       | AGTGATGGCATGGACTGTGG       |
| <b>mCLEC14A</b> | GACCAAAGTTGAAGAACAGC       | GAAGAGGTGTCGAAAGTCAG       |
| <b>mVEGFR-2</b> | CTACCCCAGAAATGTACCAGAC     | AATCCTCTTCCATGCTCAGTG      |
| <b>mVEGFR-3</b> | TGGCAAATGGTTACTCCATGACCC   | ACATCGAGTCCTTCCTGTTGACCA   |
| <b>mDII4</b>    | GGAACCTTCTCACTCAACATCC     | CTCGTCTGTTCGCCAAATCT       |
| <b>mNotch1</b>  | GCAGTTGTGCTCCTGAAGAA       | CGGGCGGCCAGAAAC            |
| <b>mHey1</b>    | CATGAAGAGAGCTCACCCAGA      | CGCCGAACTCAAGTTTCC         |
| <b>mHes1</b>    | ACACCGGACAAACCAAAGAC       | CGCCTCTTCTCCATGATAGG       |
| <b>mNrarp</b>   | TGCTGCAGAACATGACTAAC       | GCCTTGGTGATGAGATAGAG       |
| <b>mFoxC2</b>   | CCTTCTACCGCGAGAACAAG       | CCGGGTGAGCGTCCAGTAG        |
